# Supplementary material for: Ascending neurons convey behavioral state to integrative sensory and action selection brain regions
Source: PubMed Central journal article supplement (PMC10076225; doi:10.1038/s41593-023-01281-z), 2023-03-23

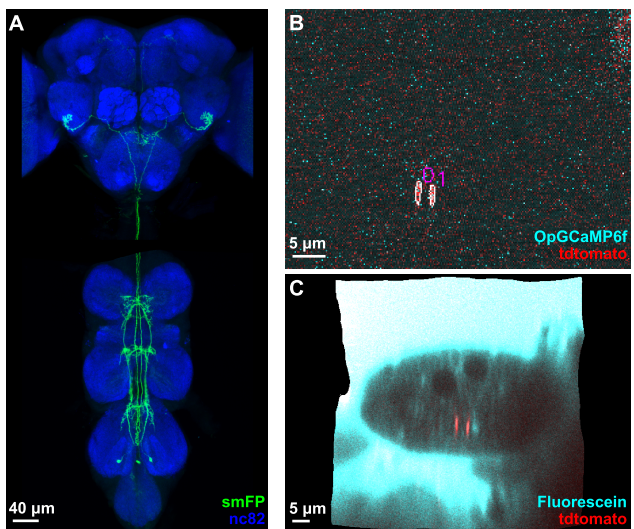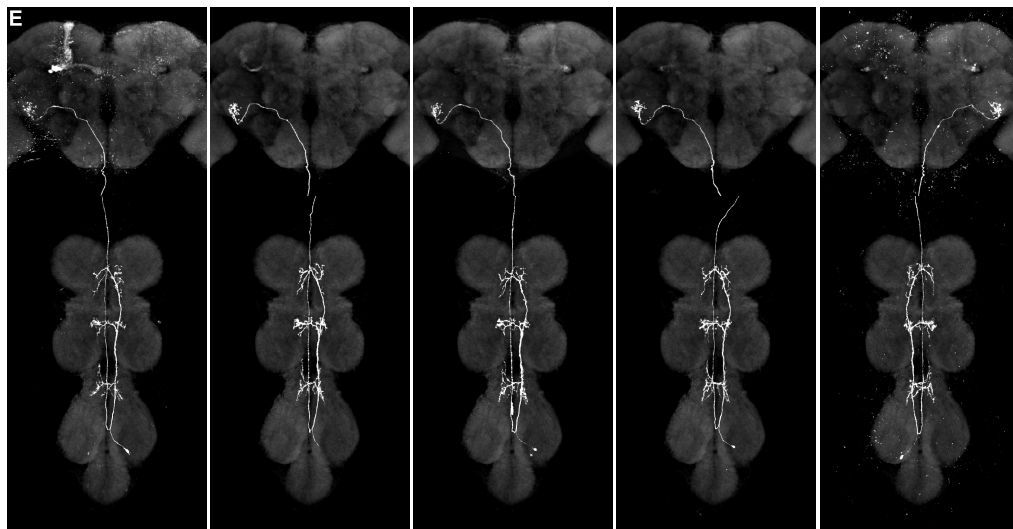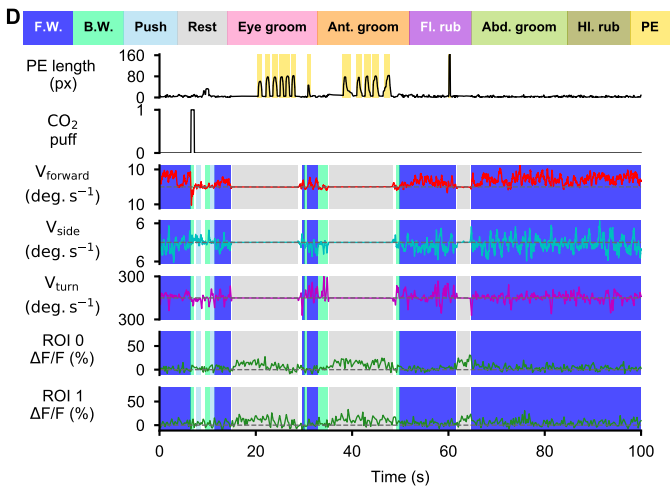



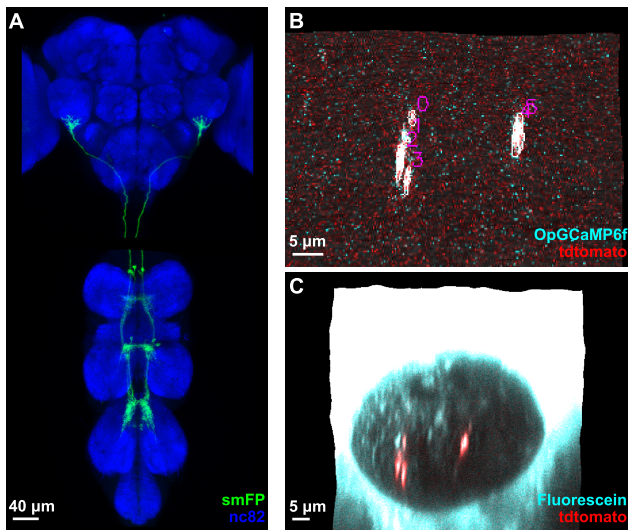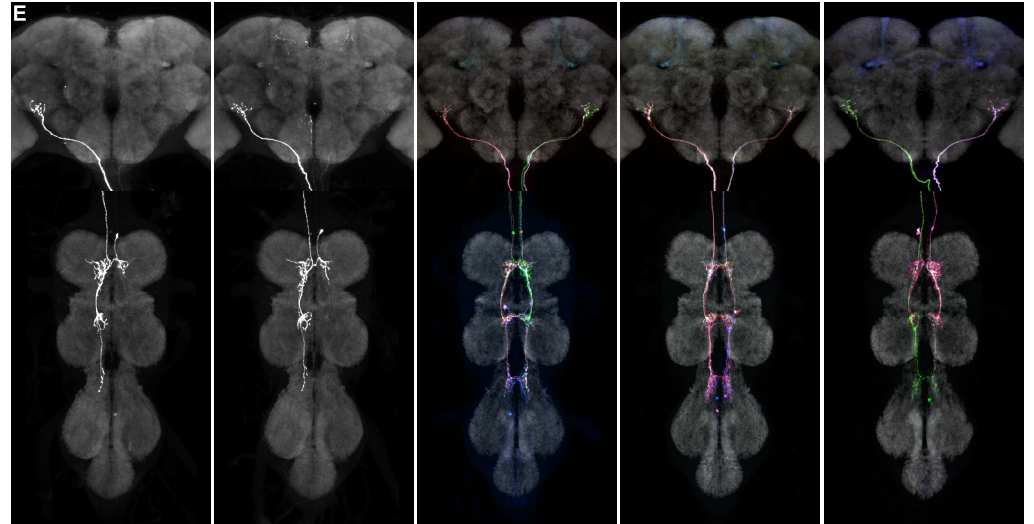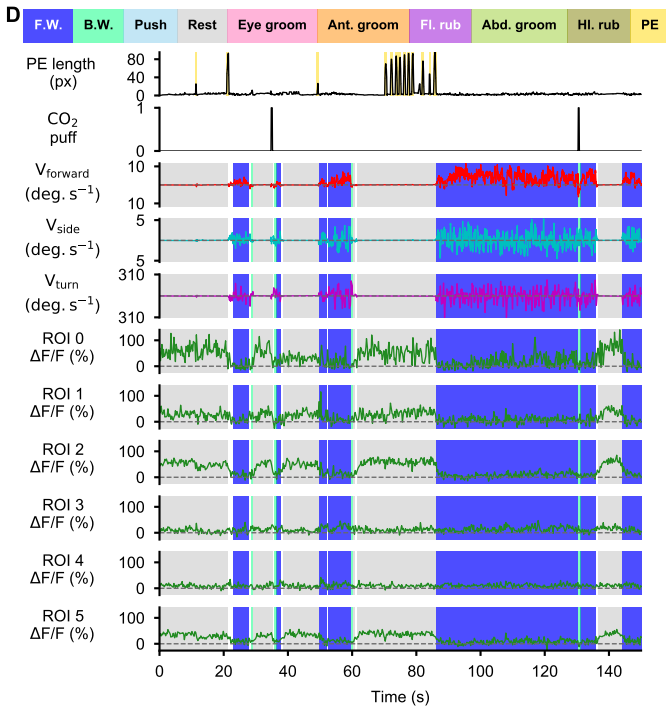

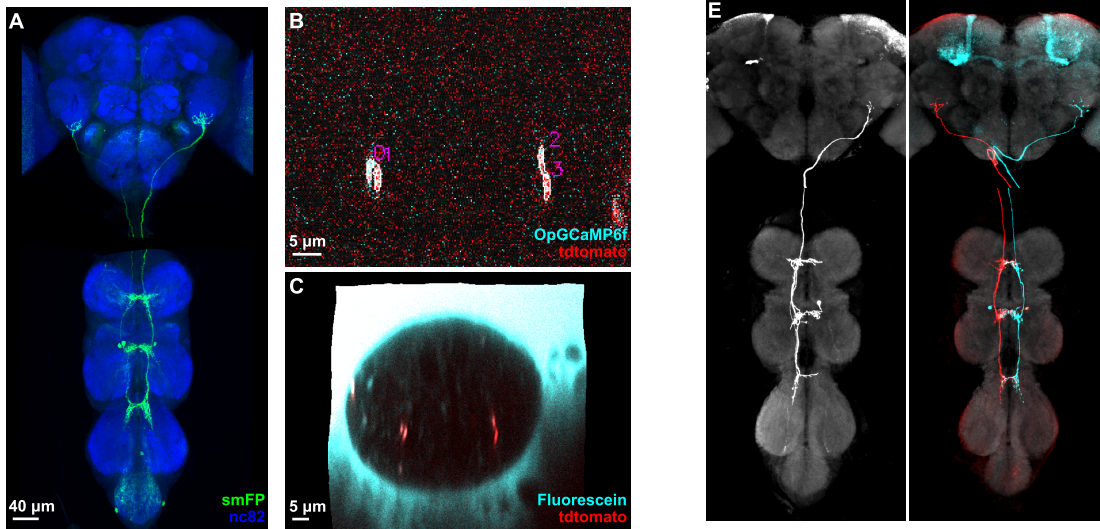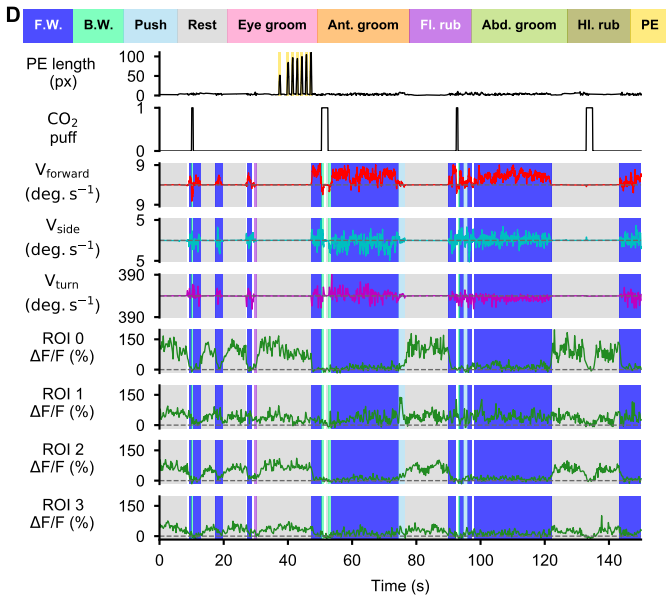

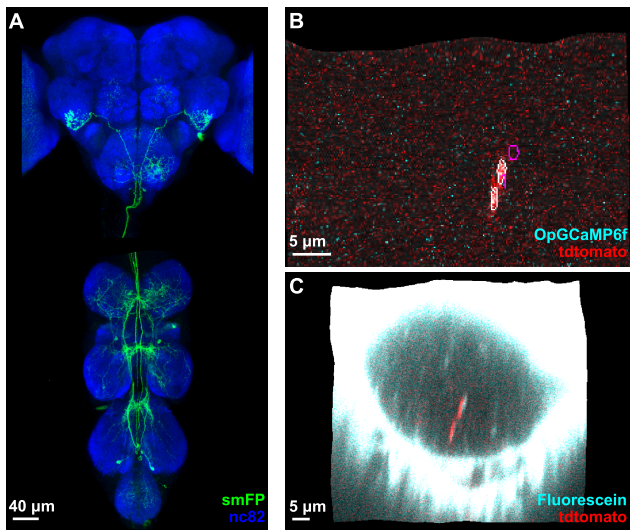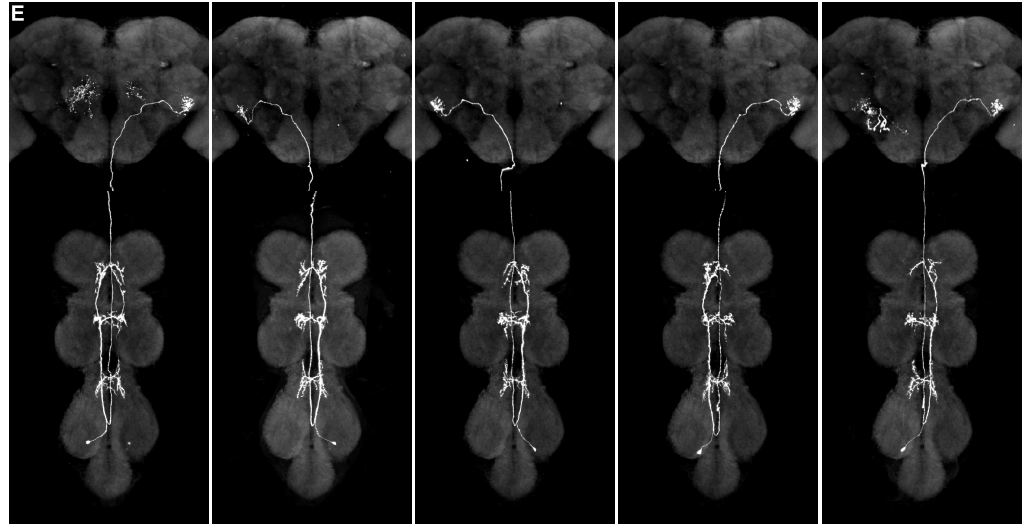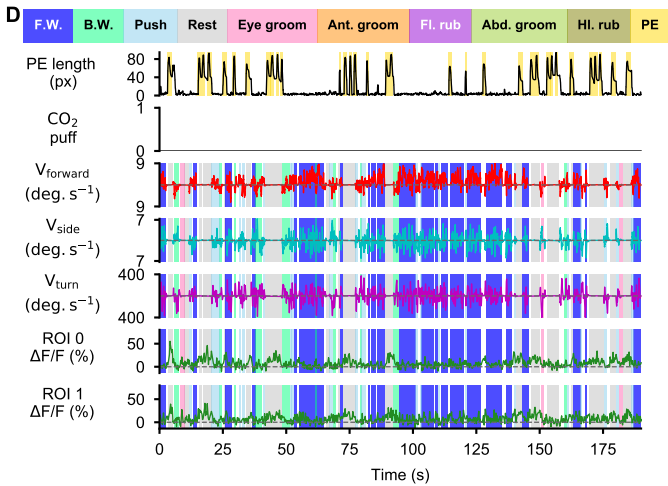

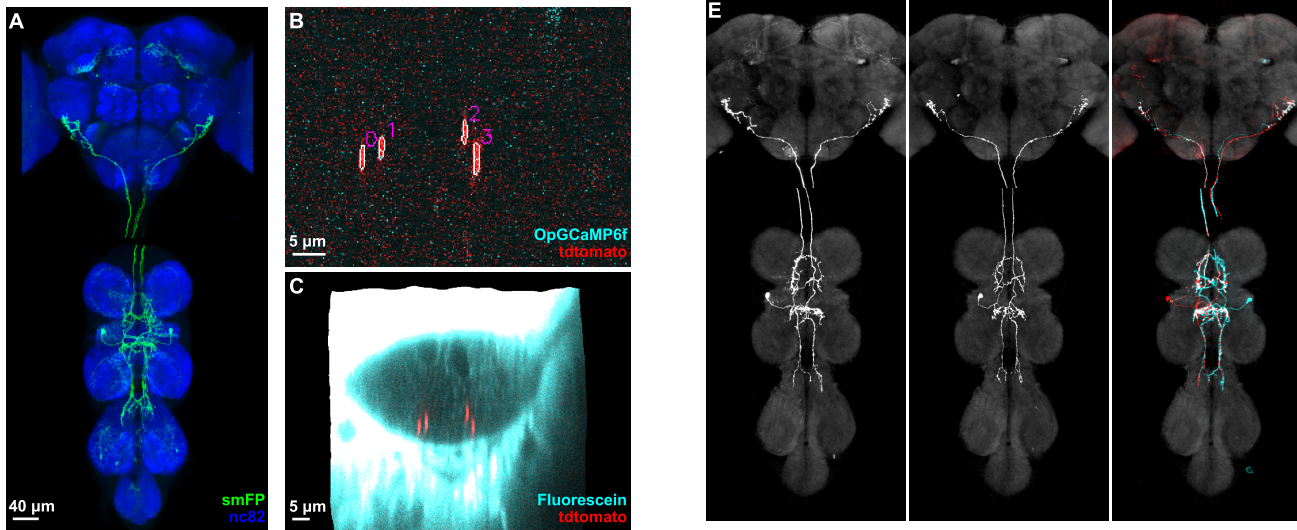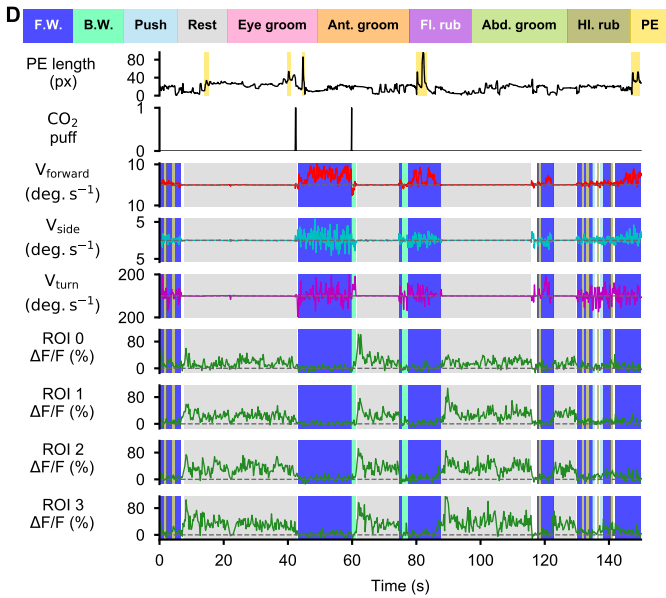



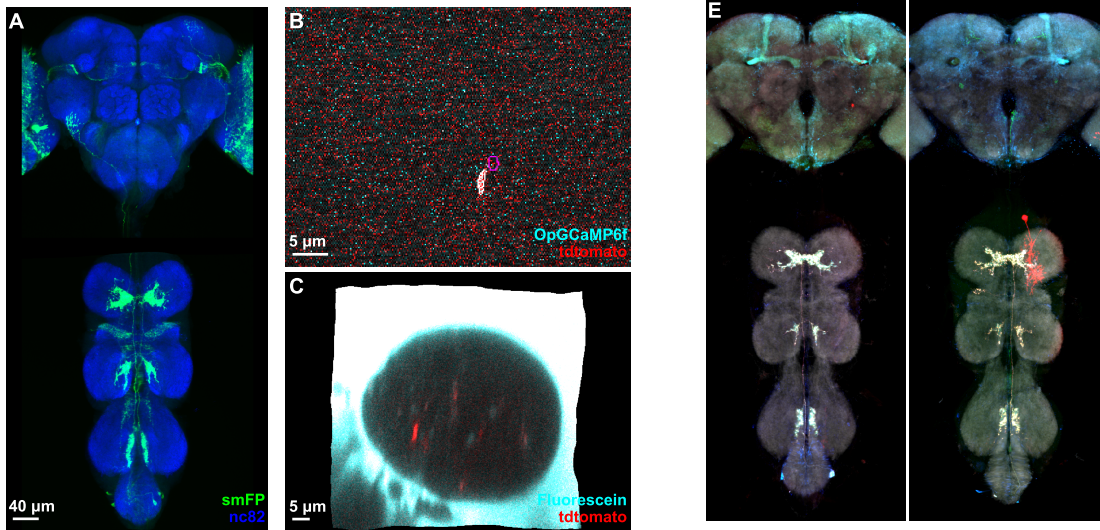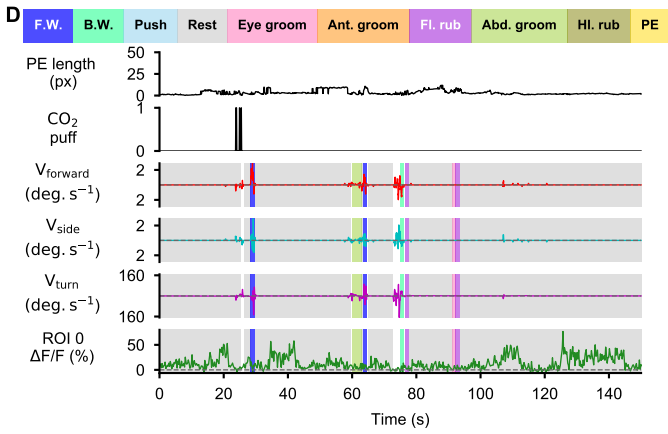

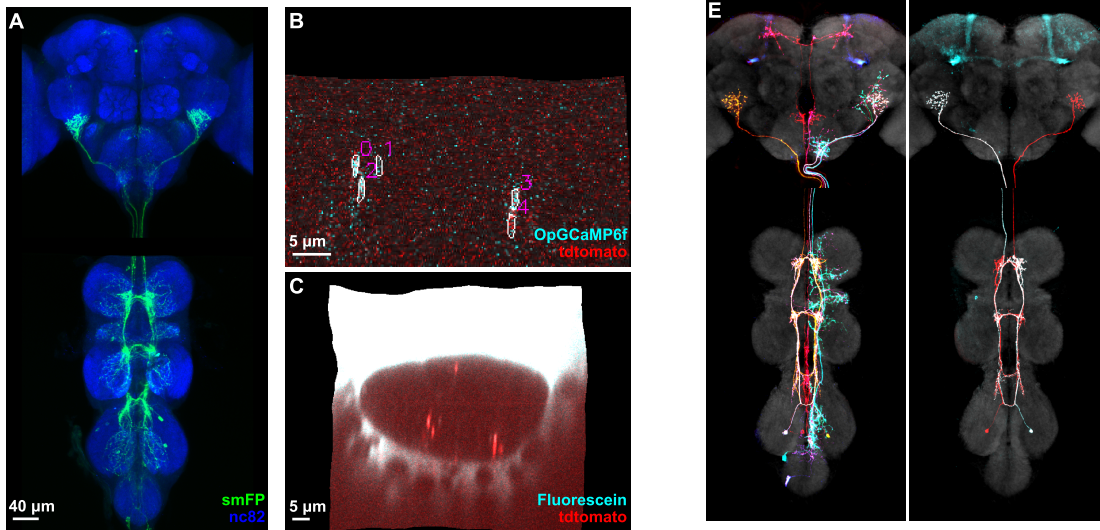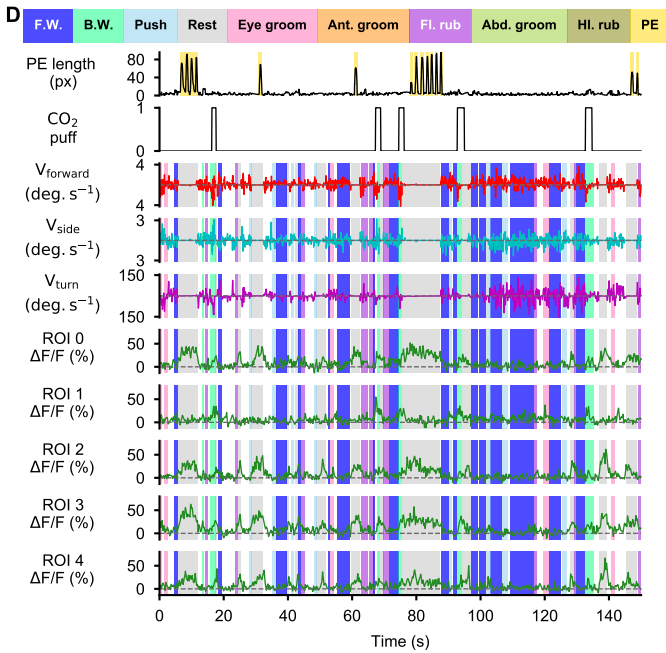

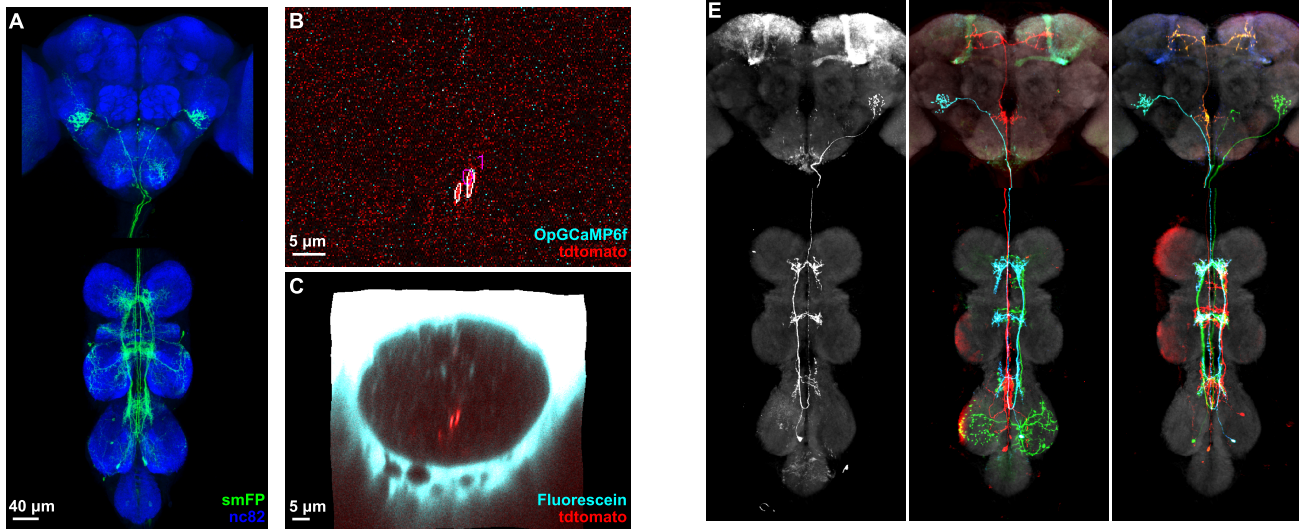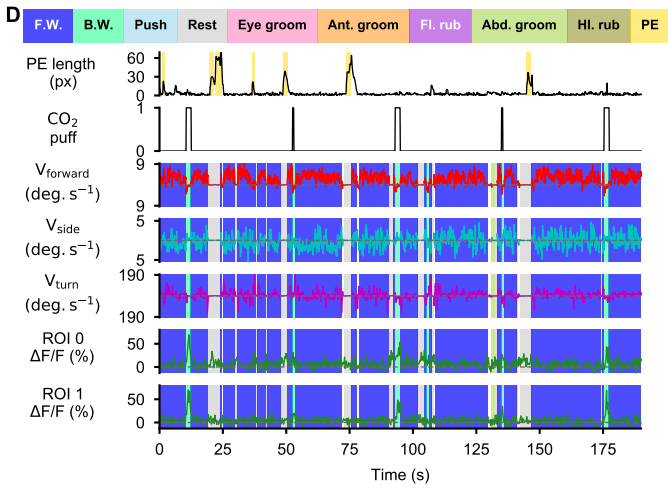

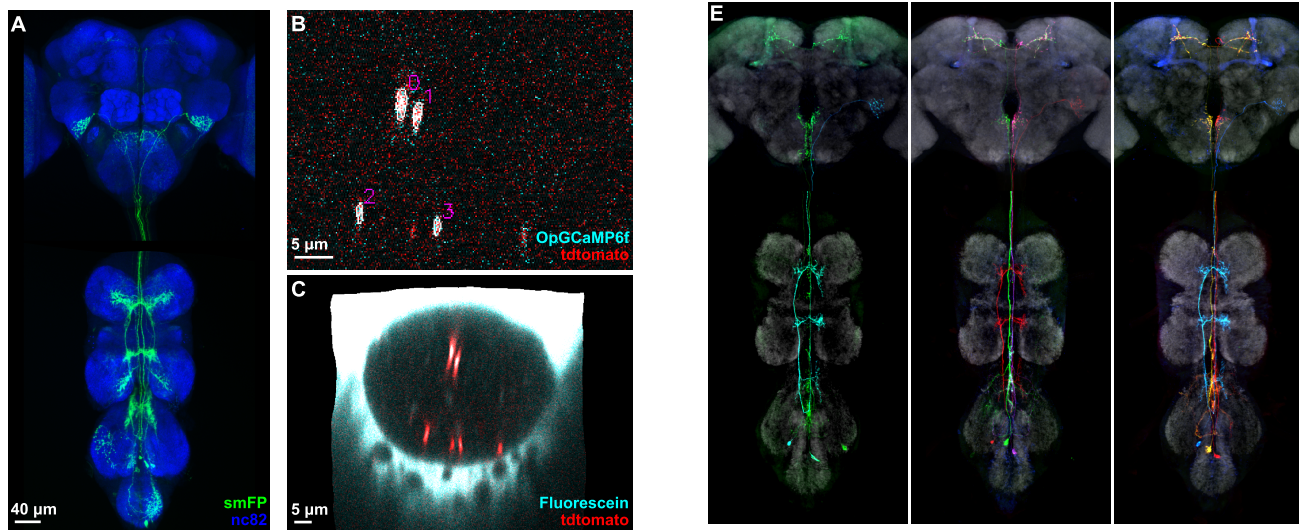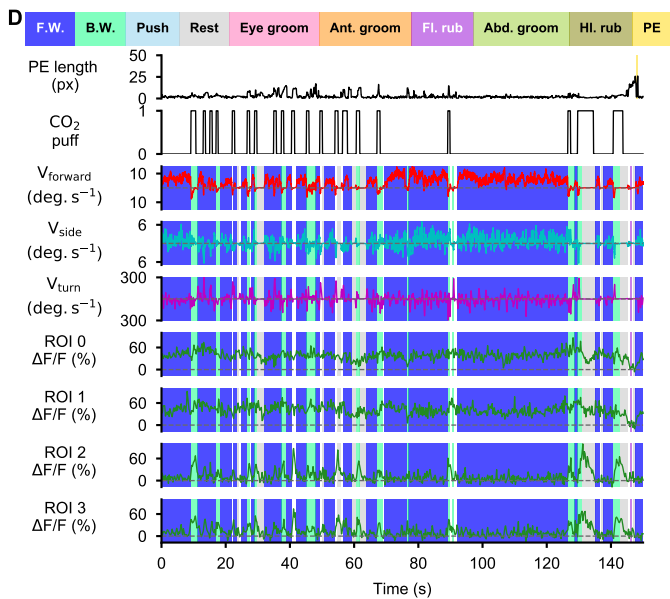



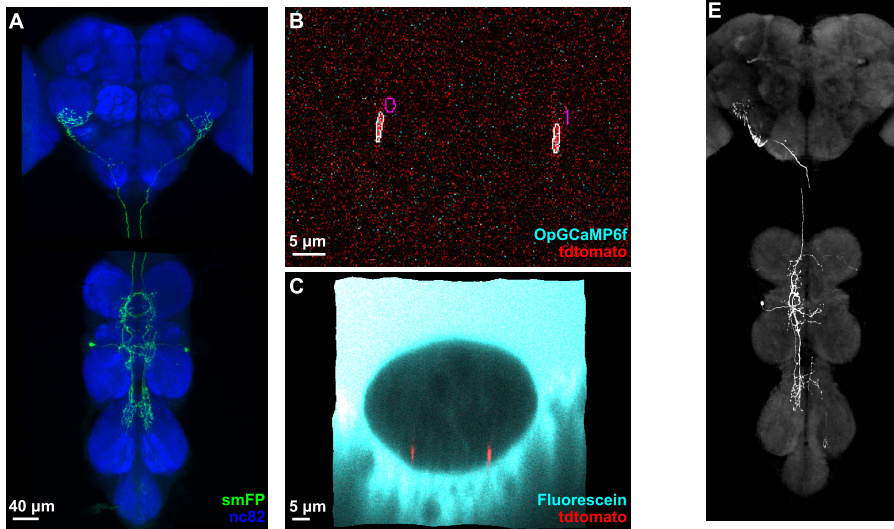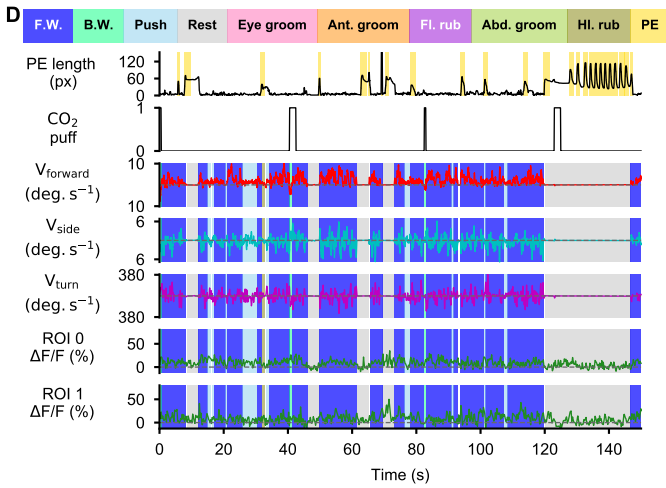

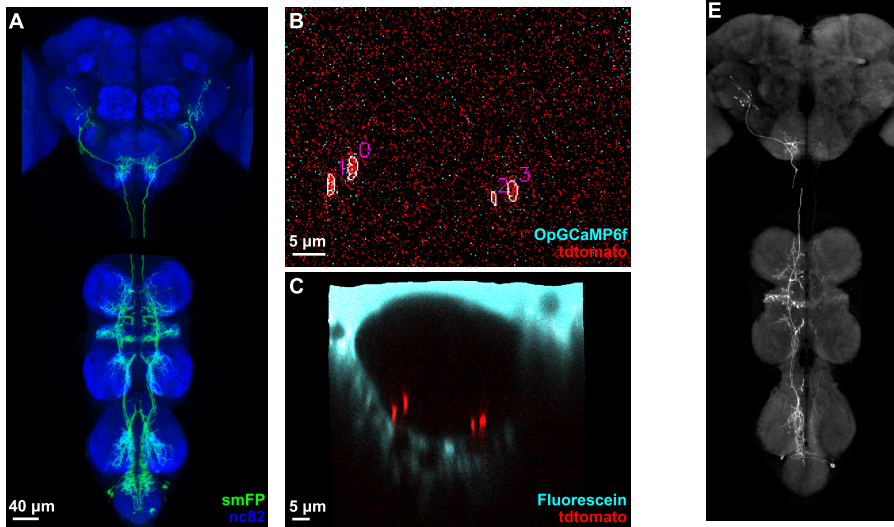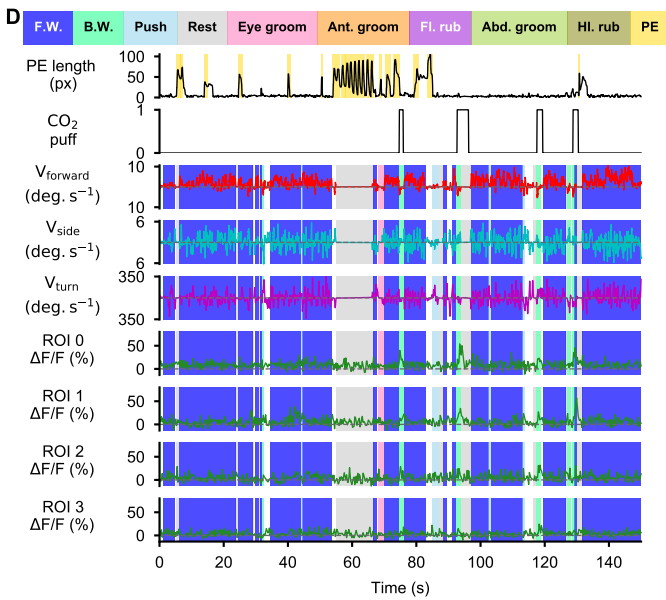

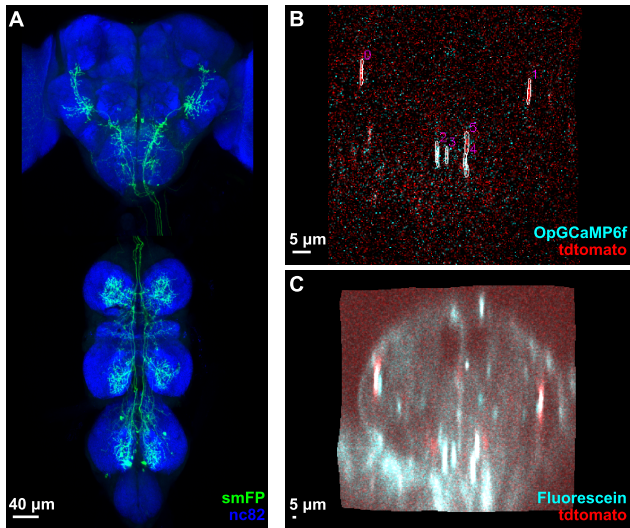

E

MCFO experiment was not performed.

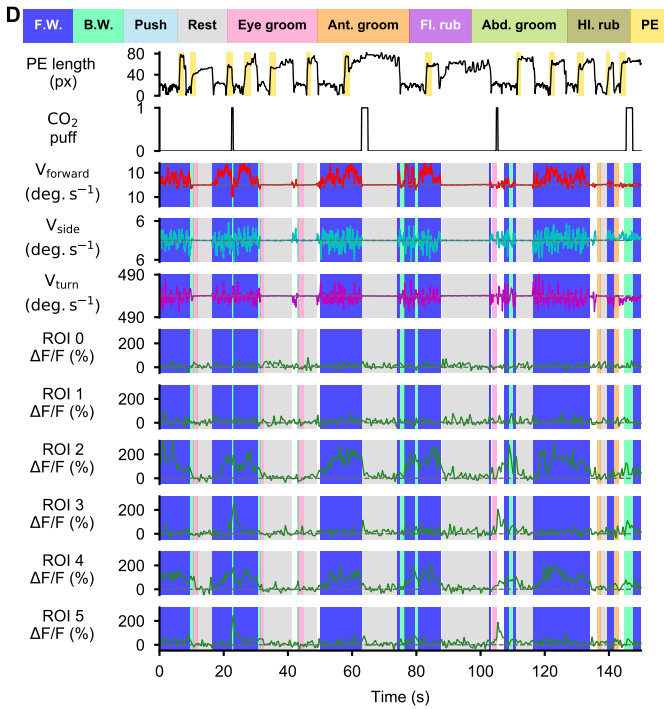

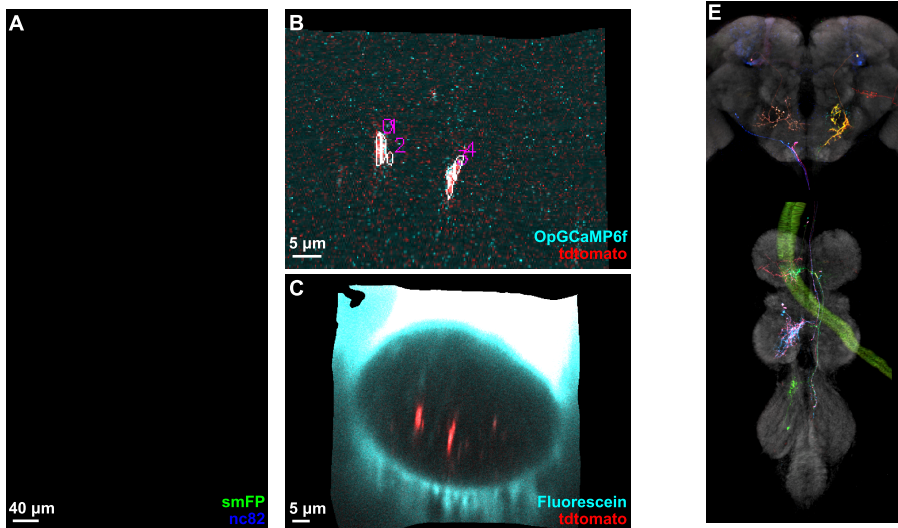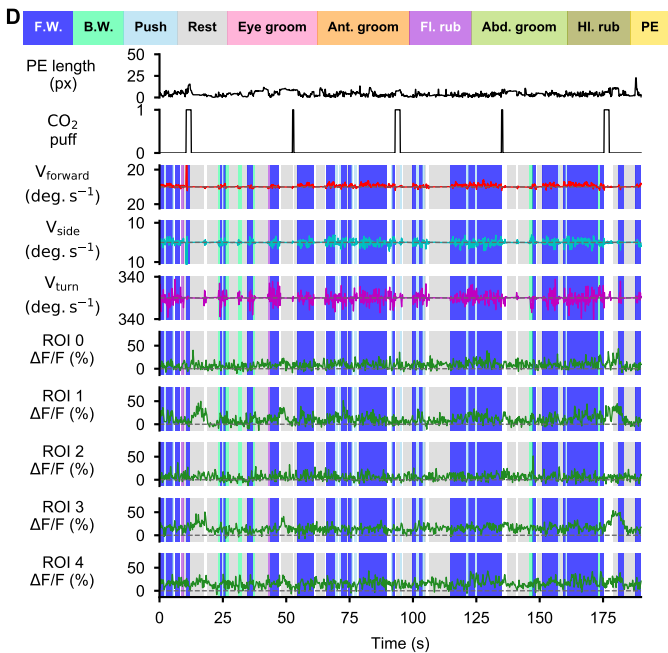



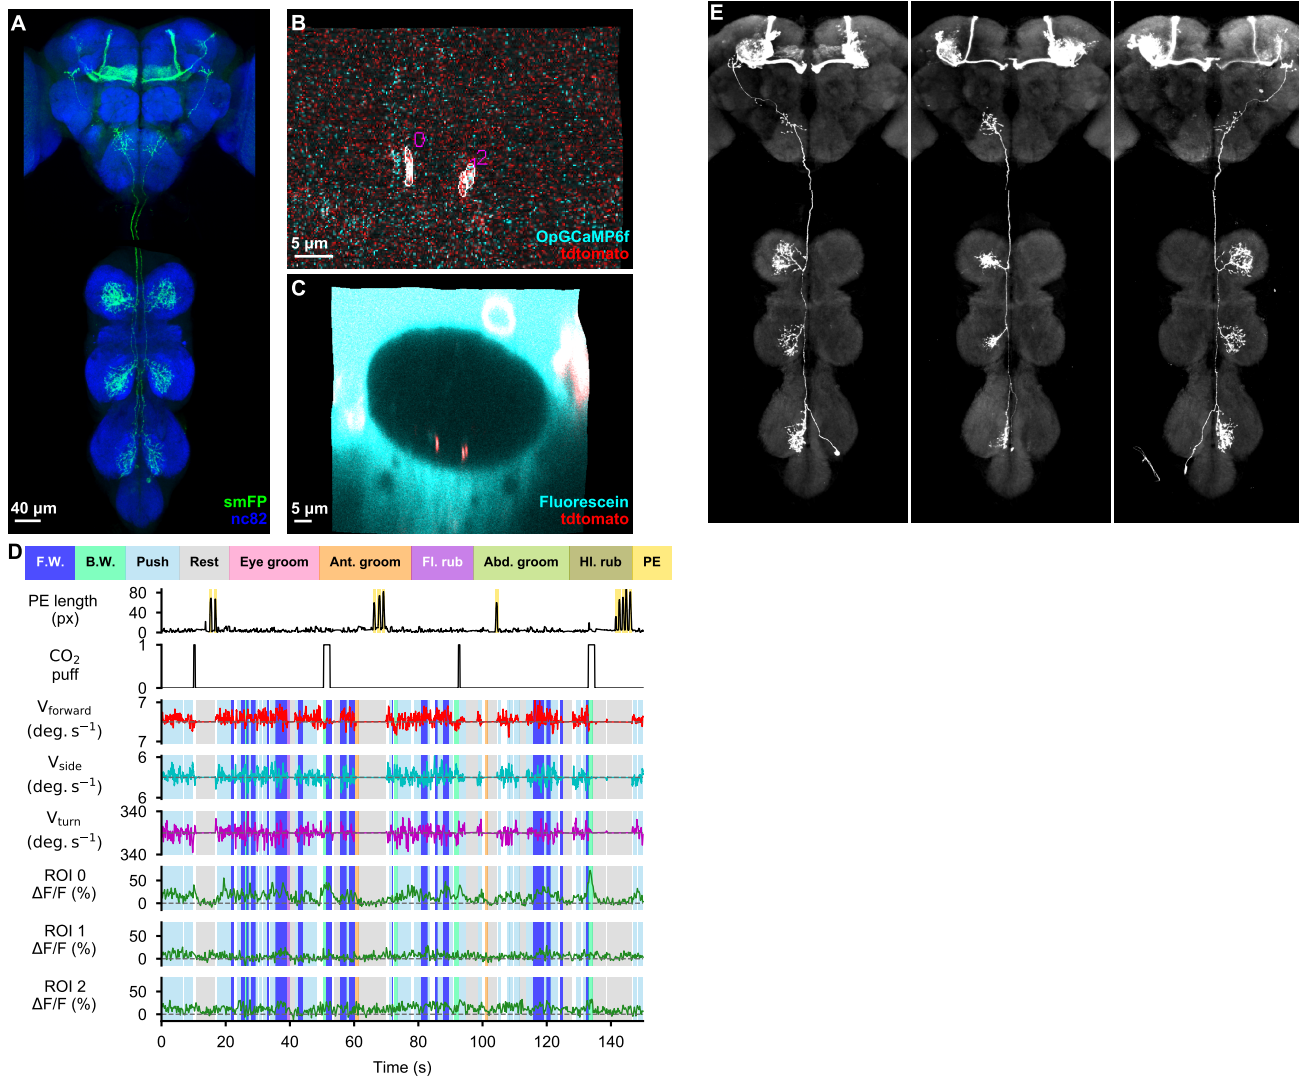

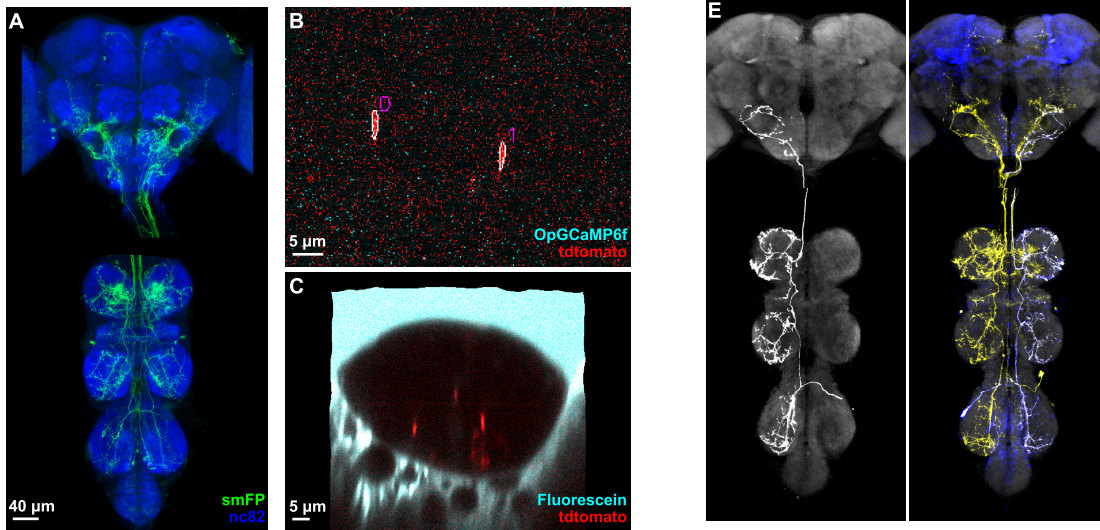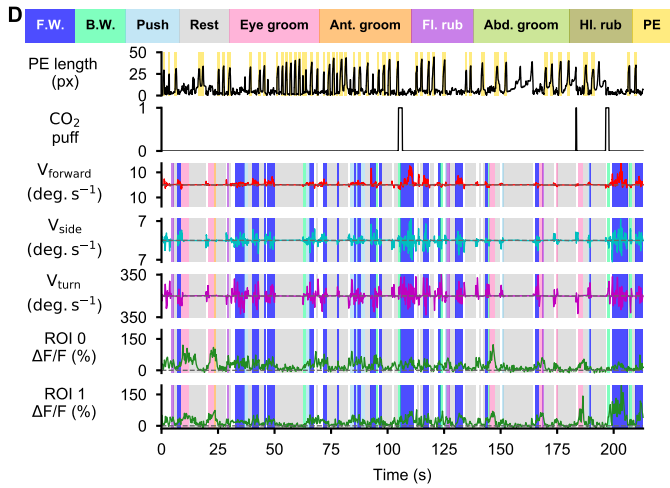

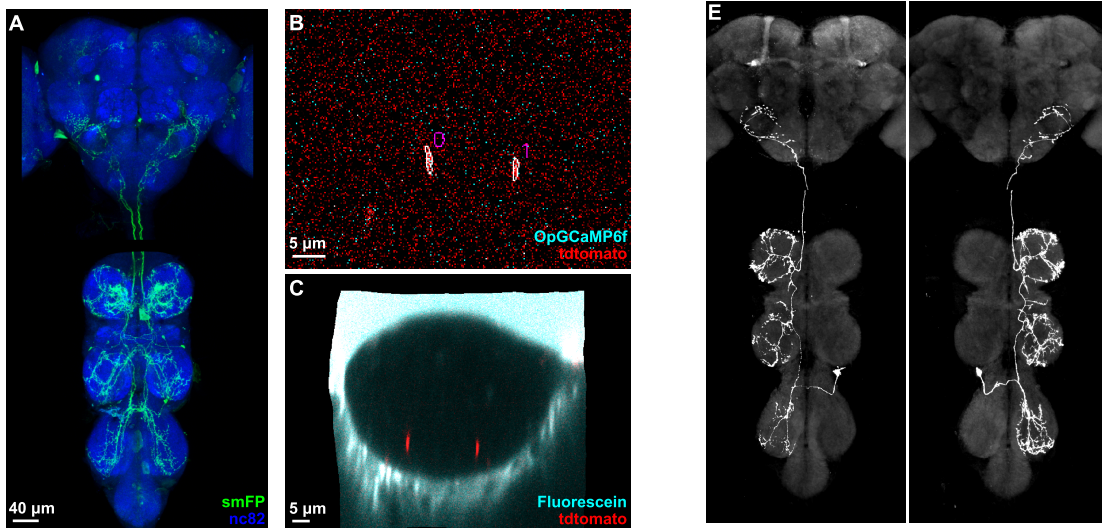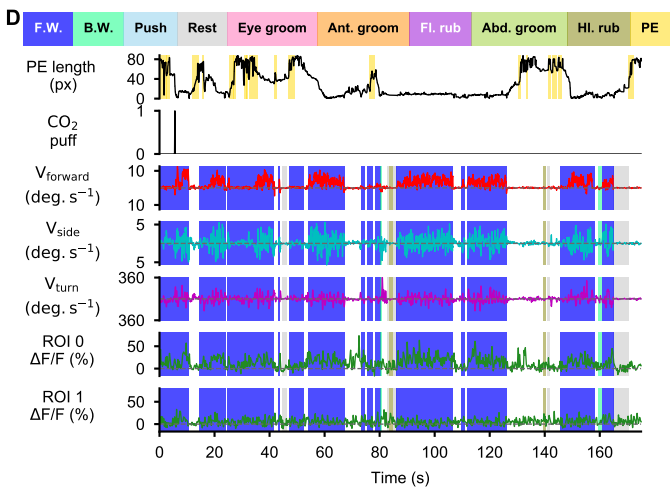

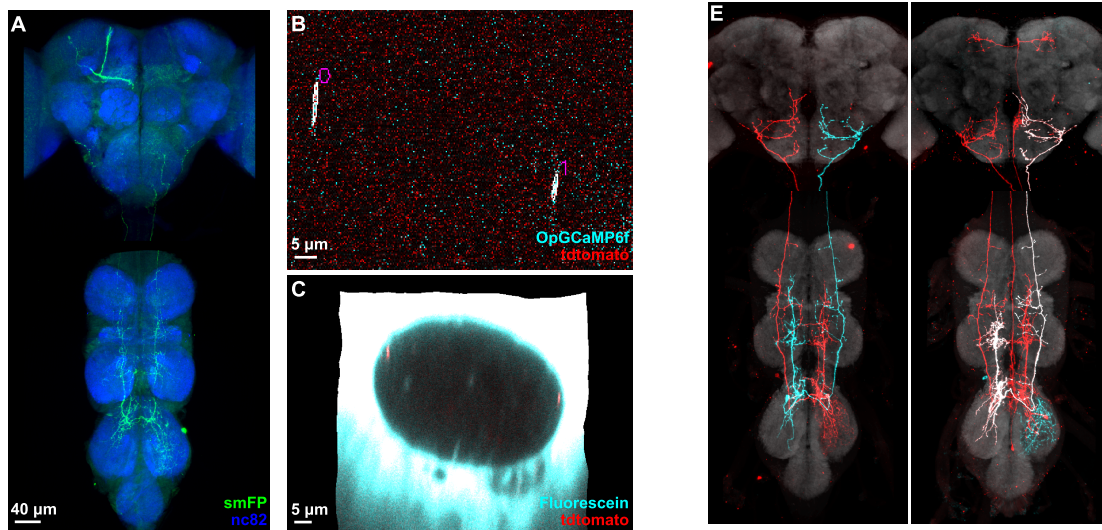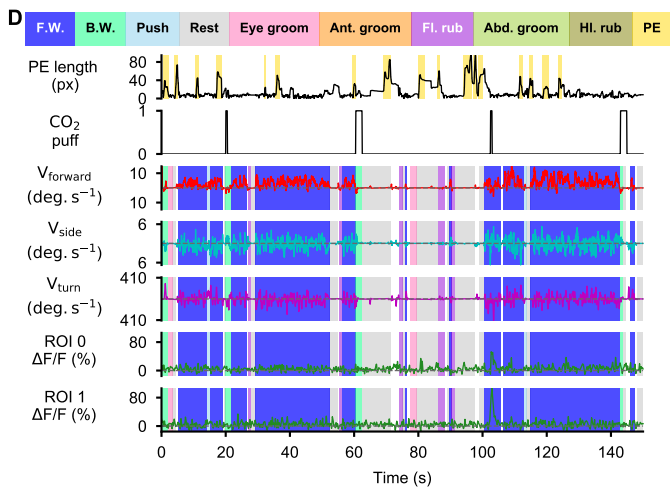



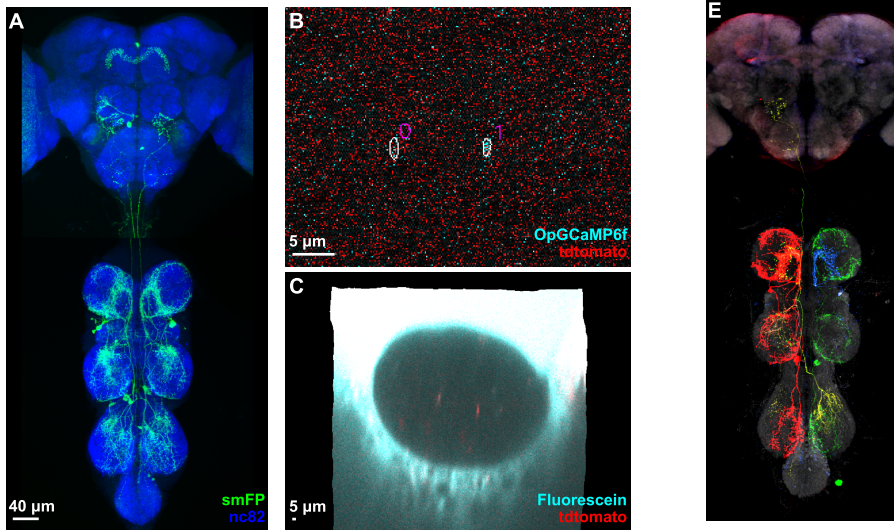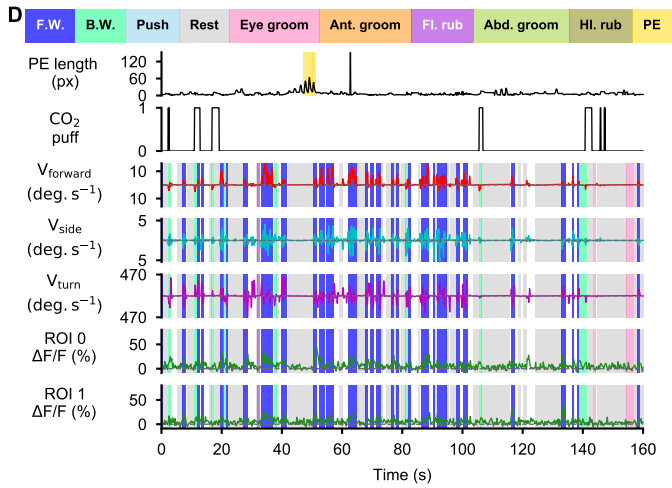

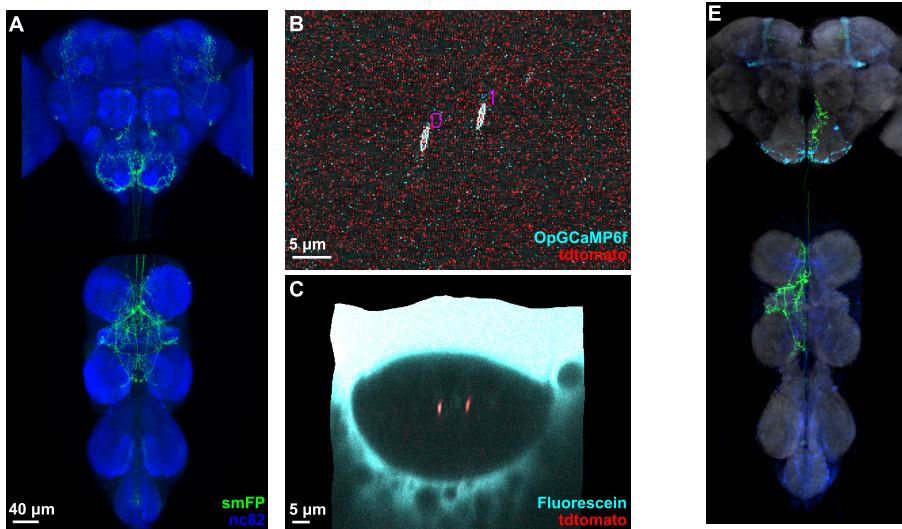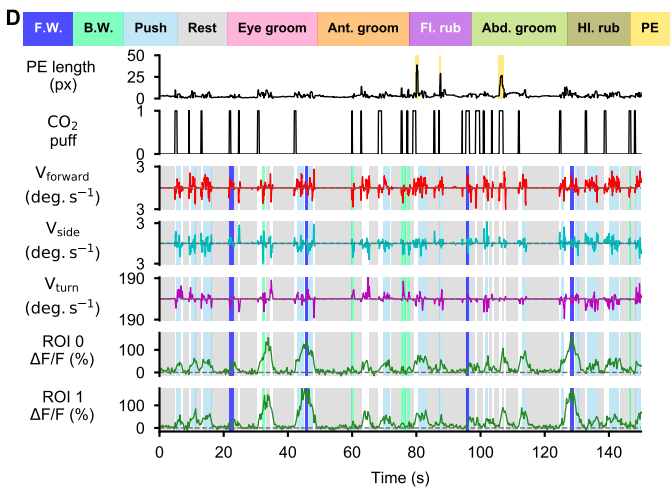

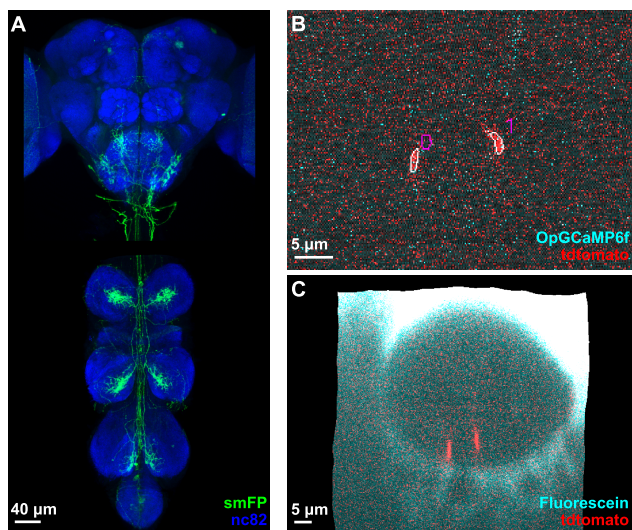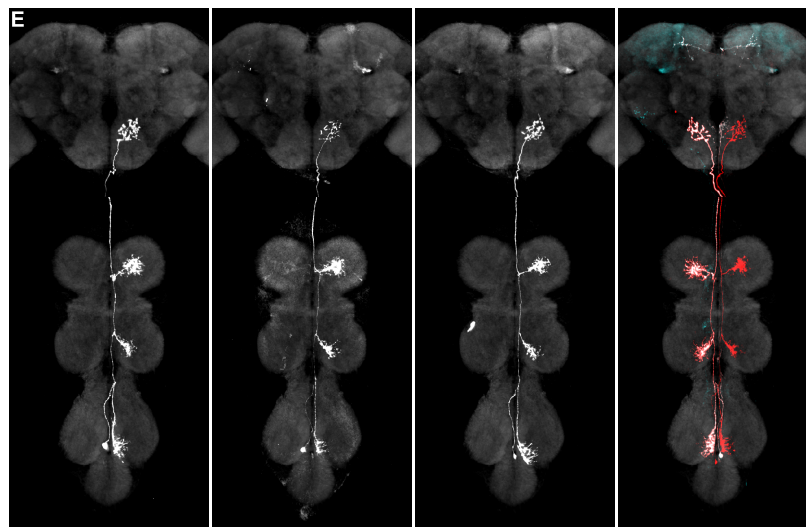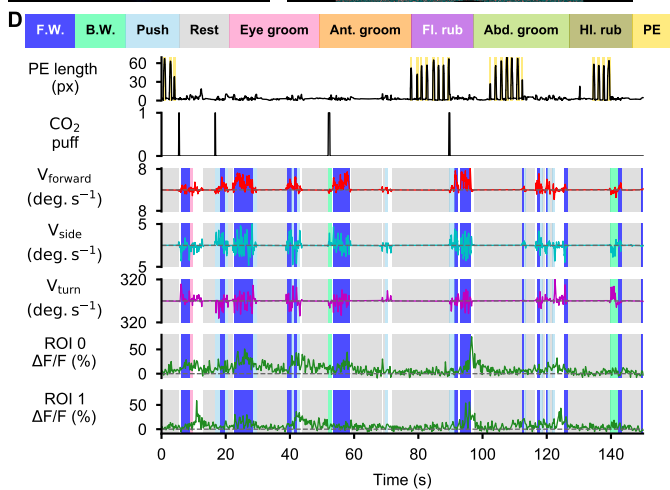



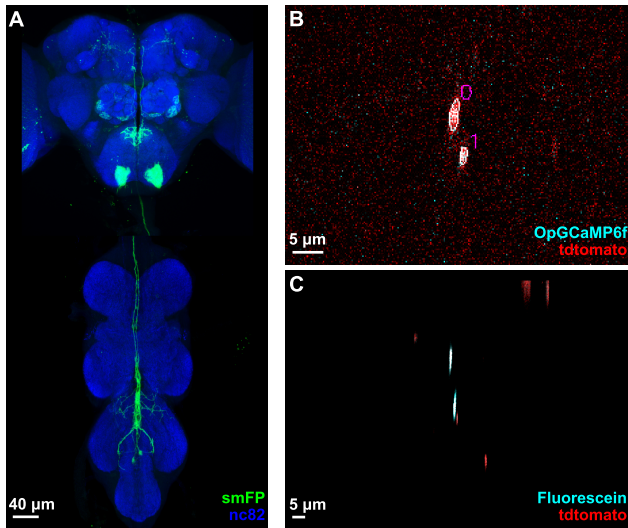

E

MCFO experiment was not performed.

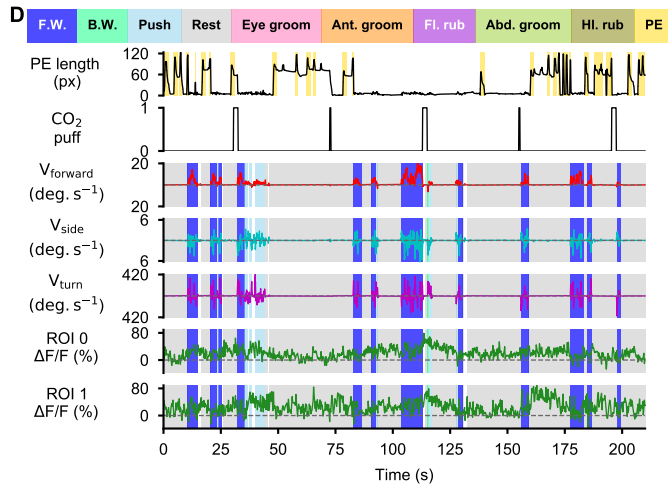

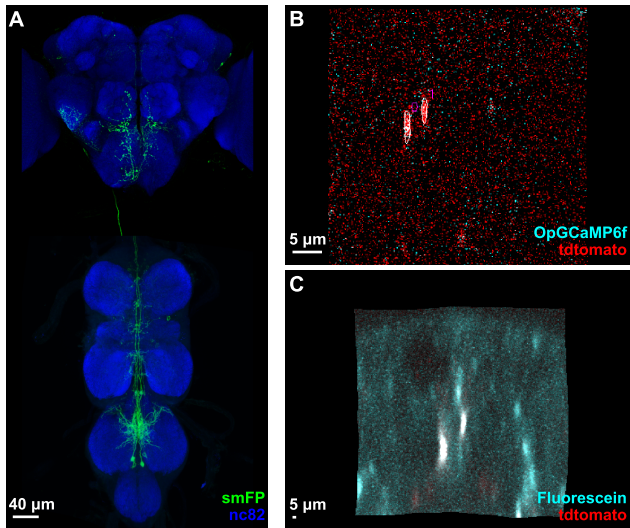

E

MCFO experiment was not performed.

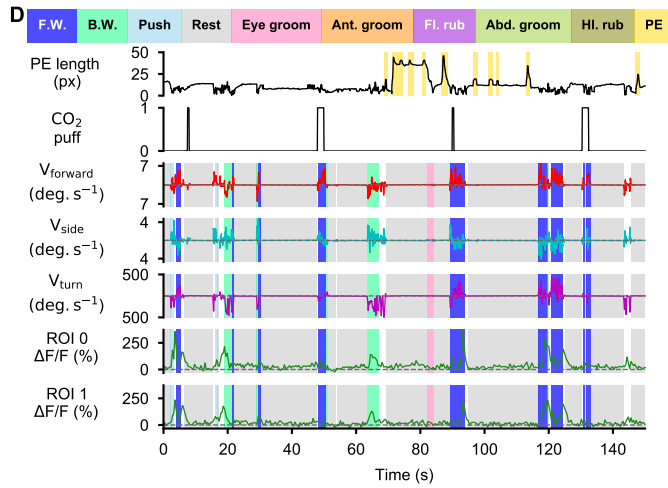



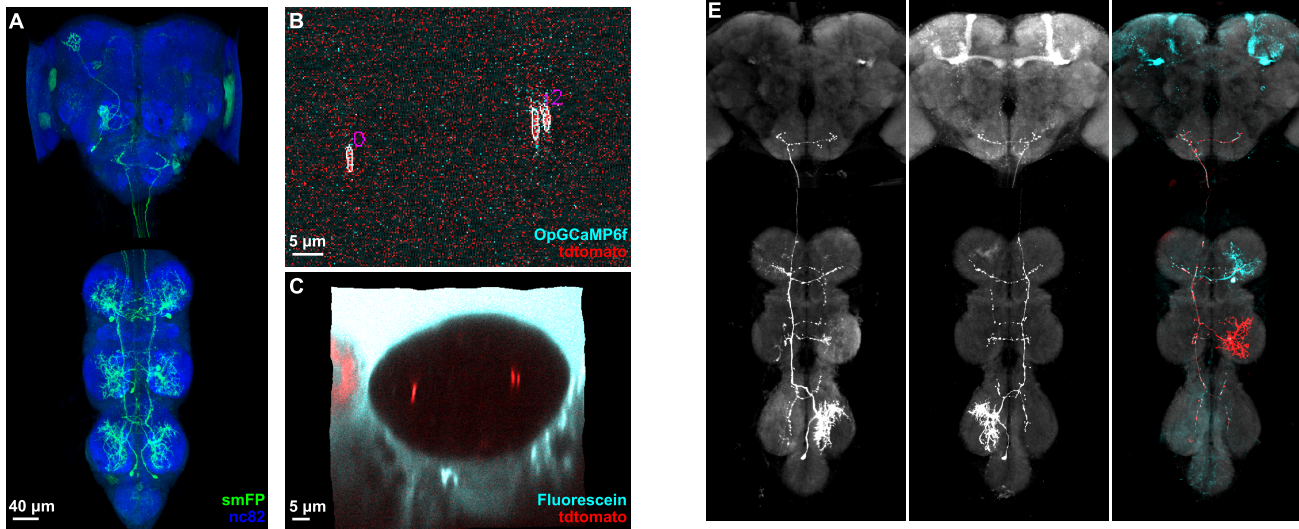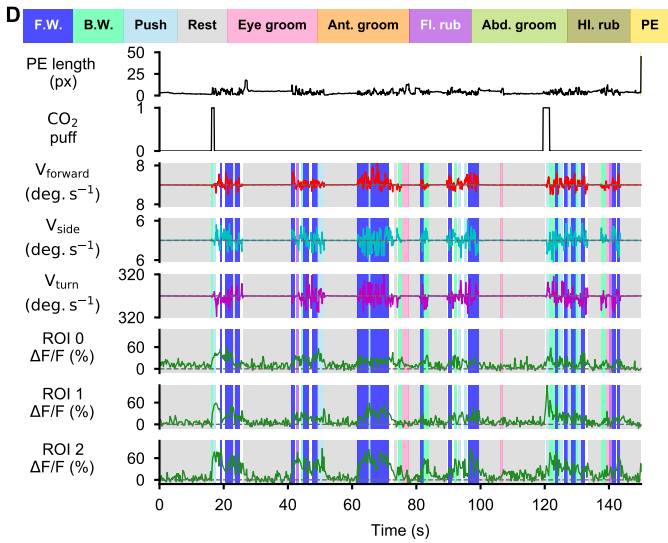

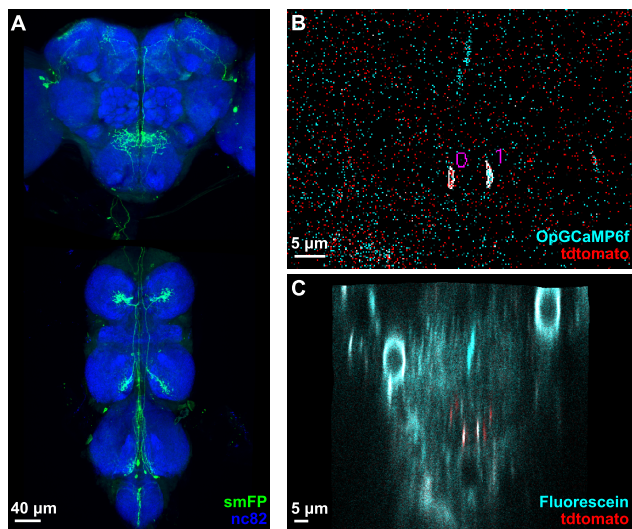

E

MCFO experiment was not performed.

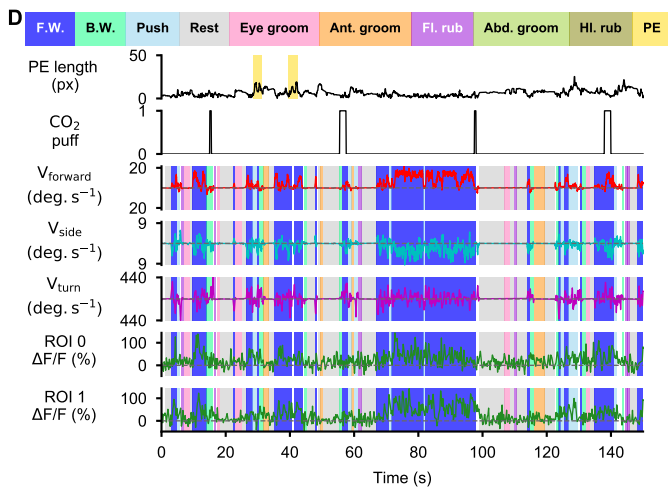

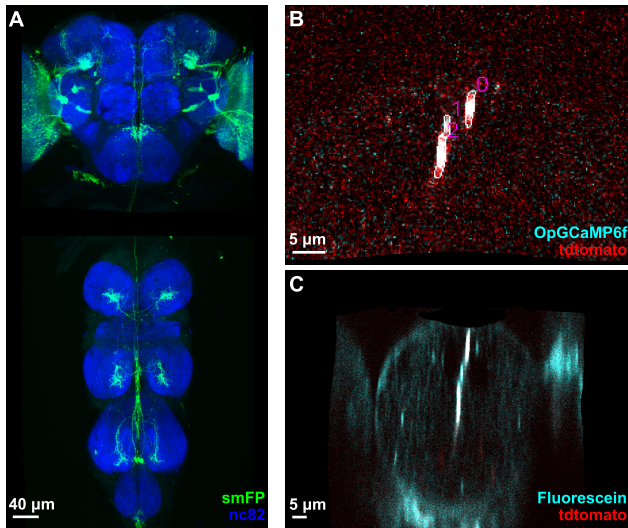

E

MCFO experiment was not performed.

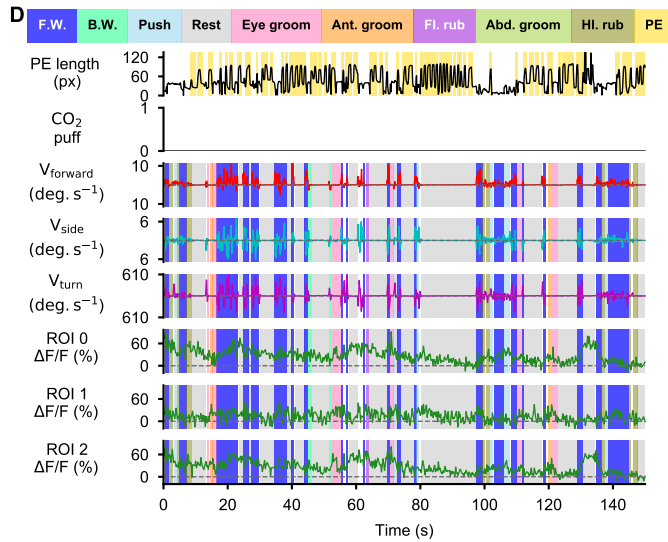

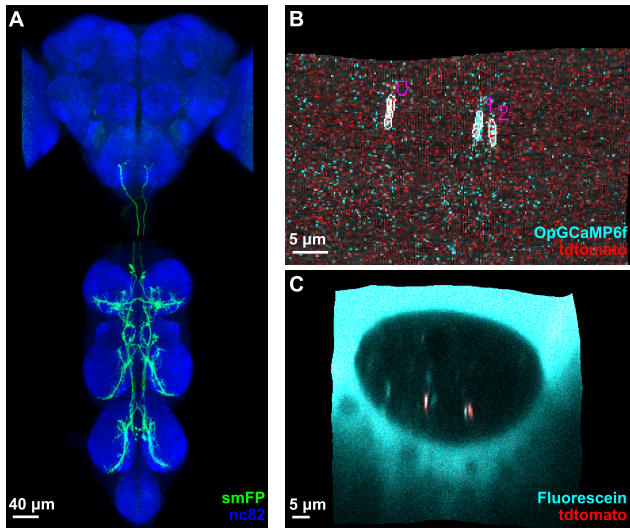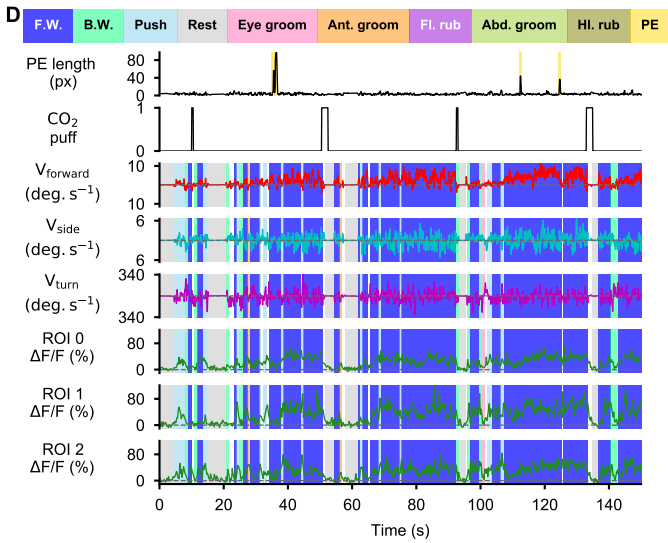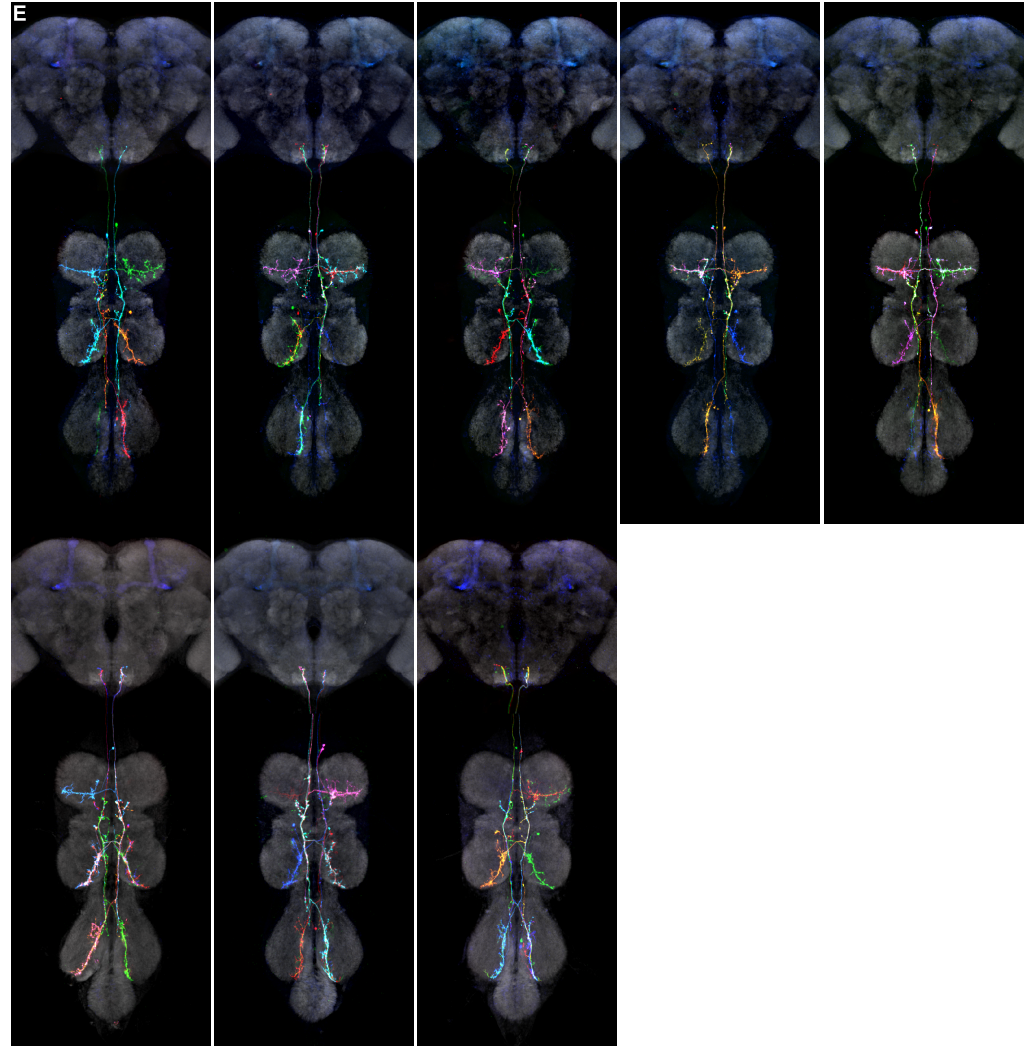

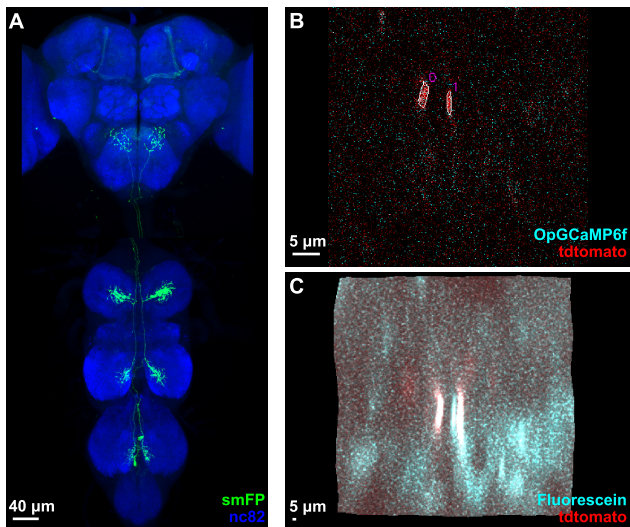

E

MCFO experiment was not performed.

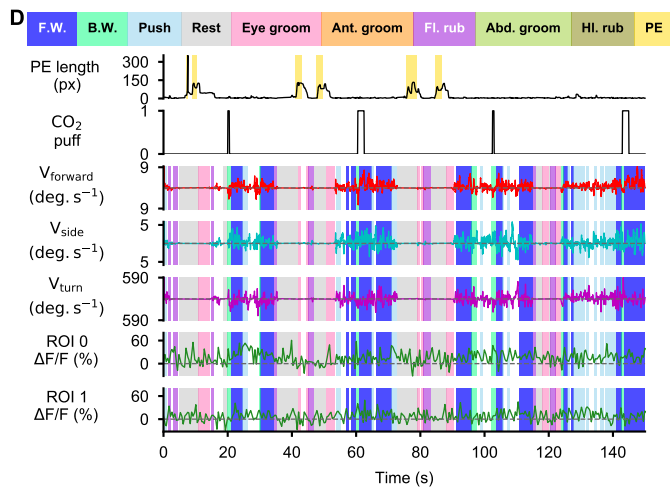



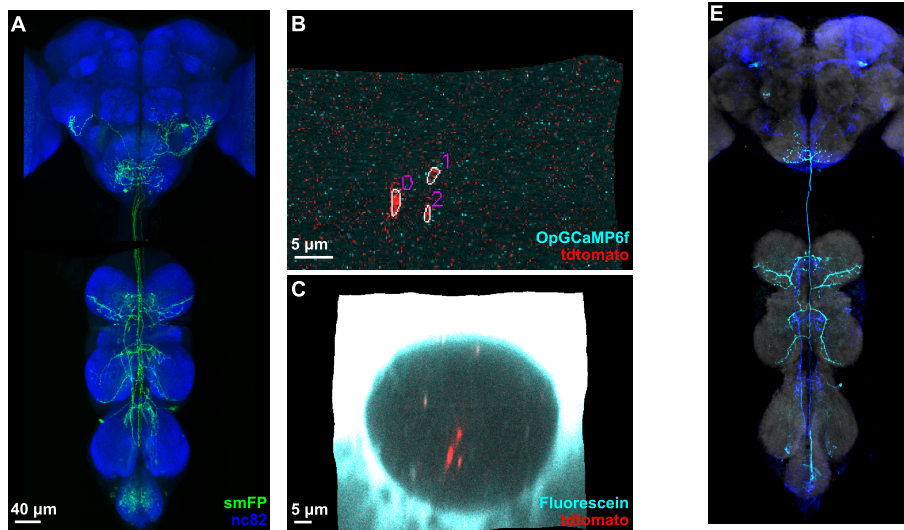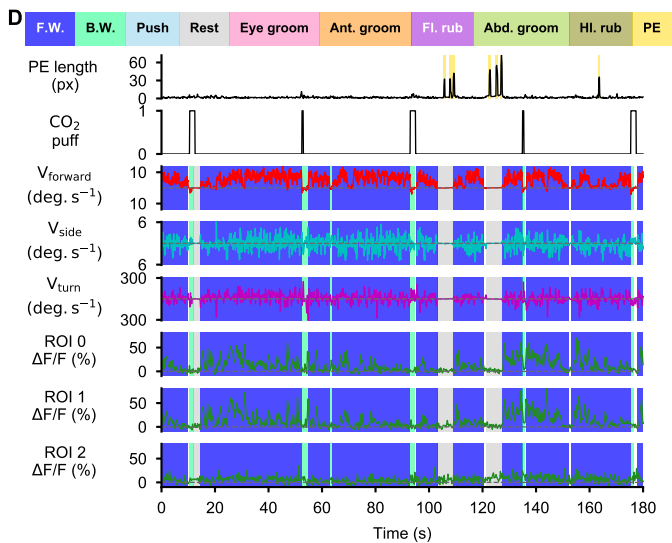

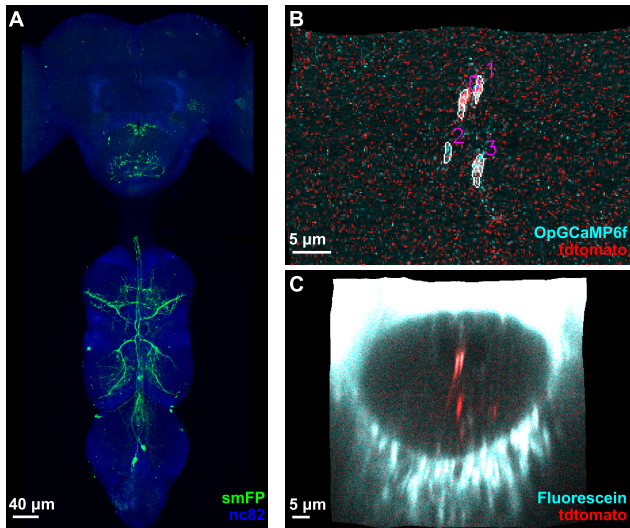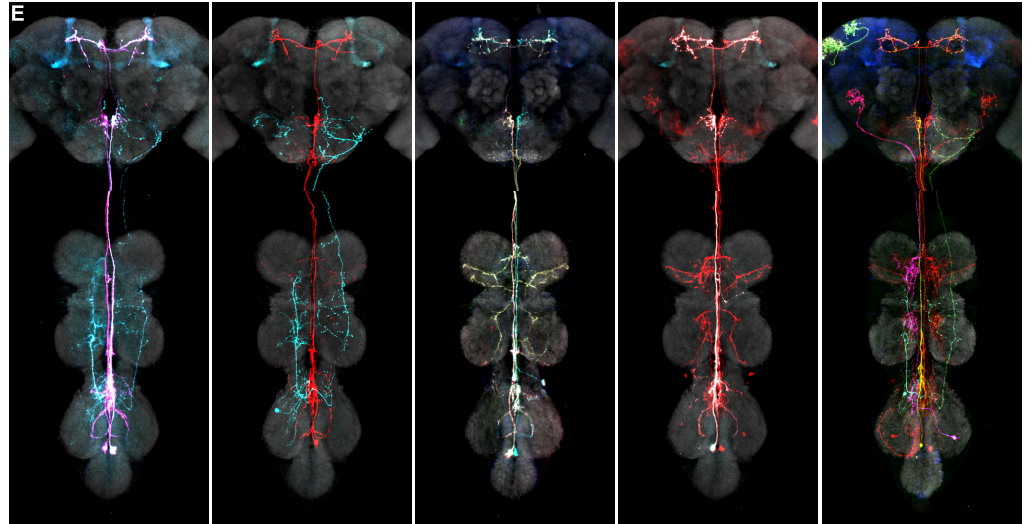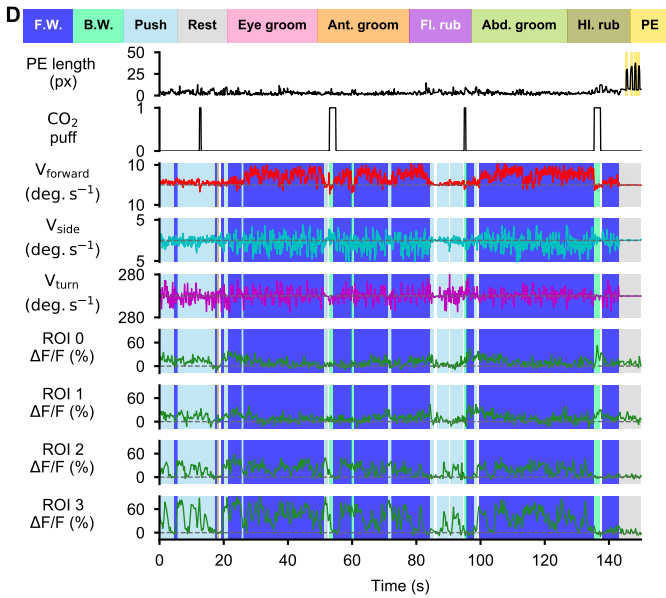

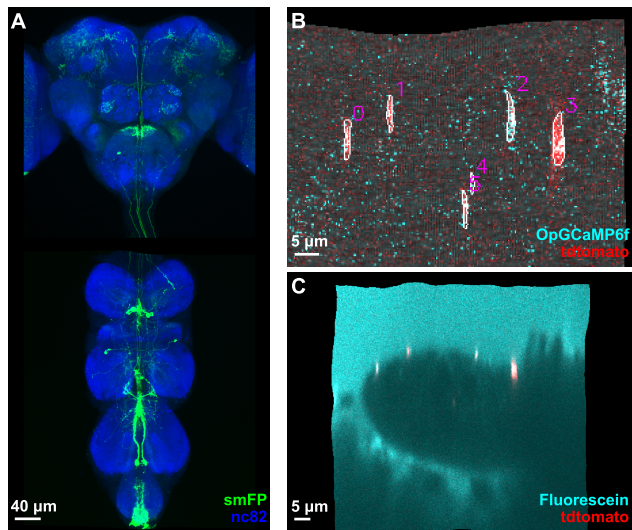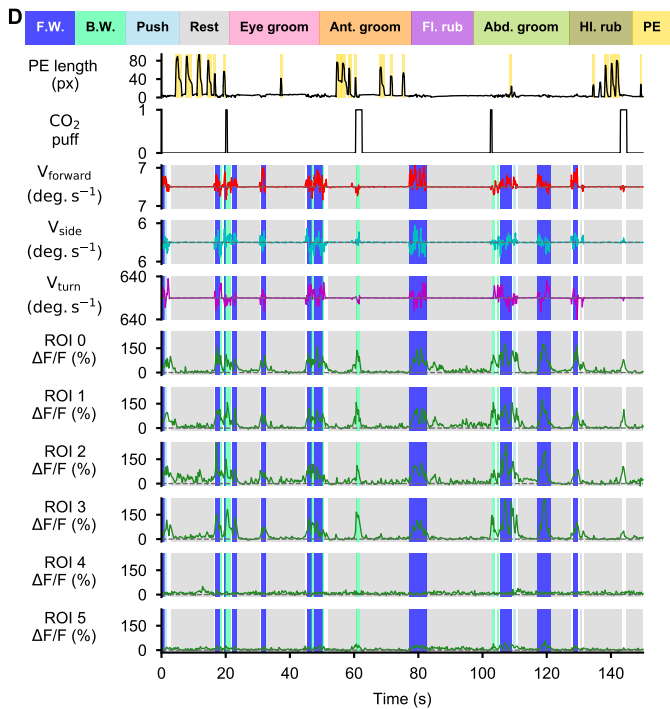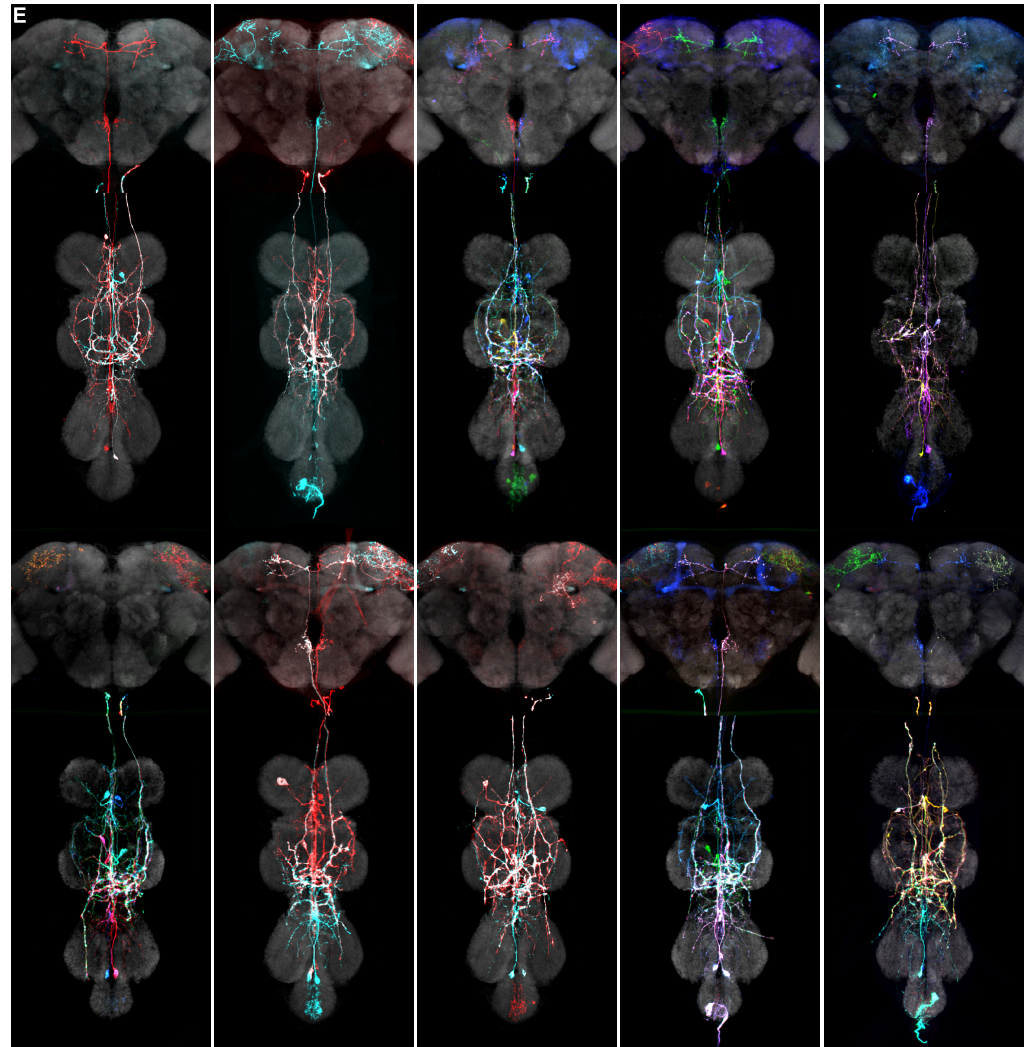

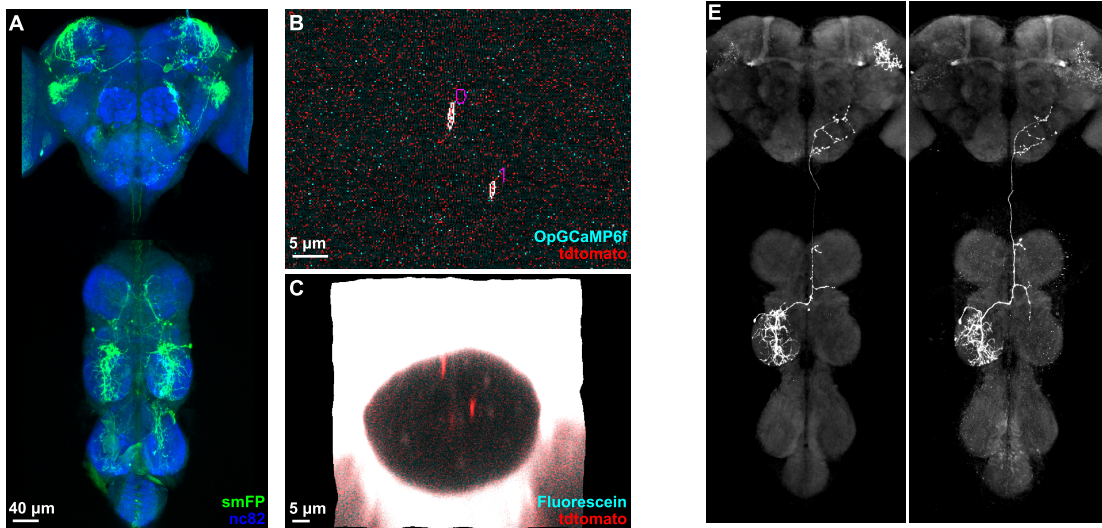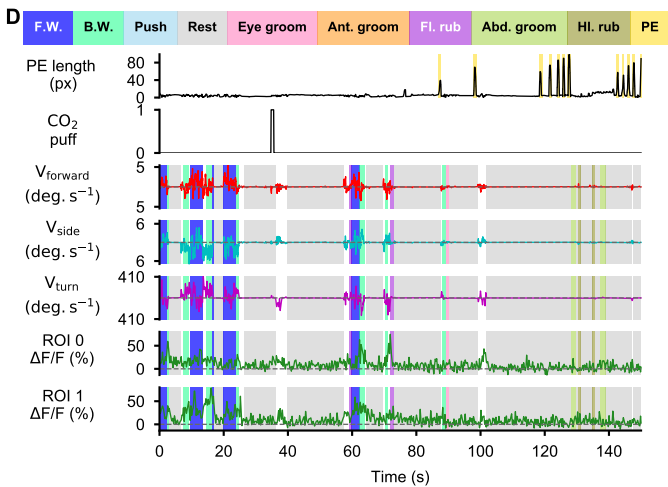



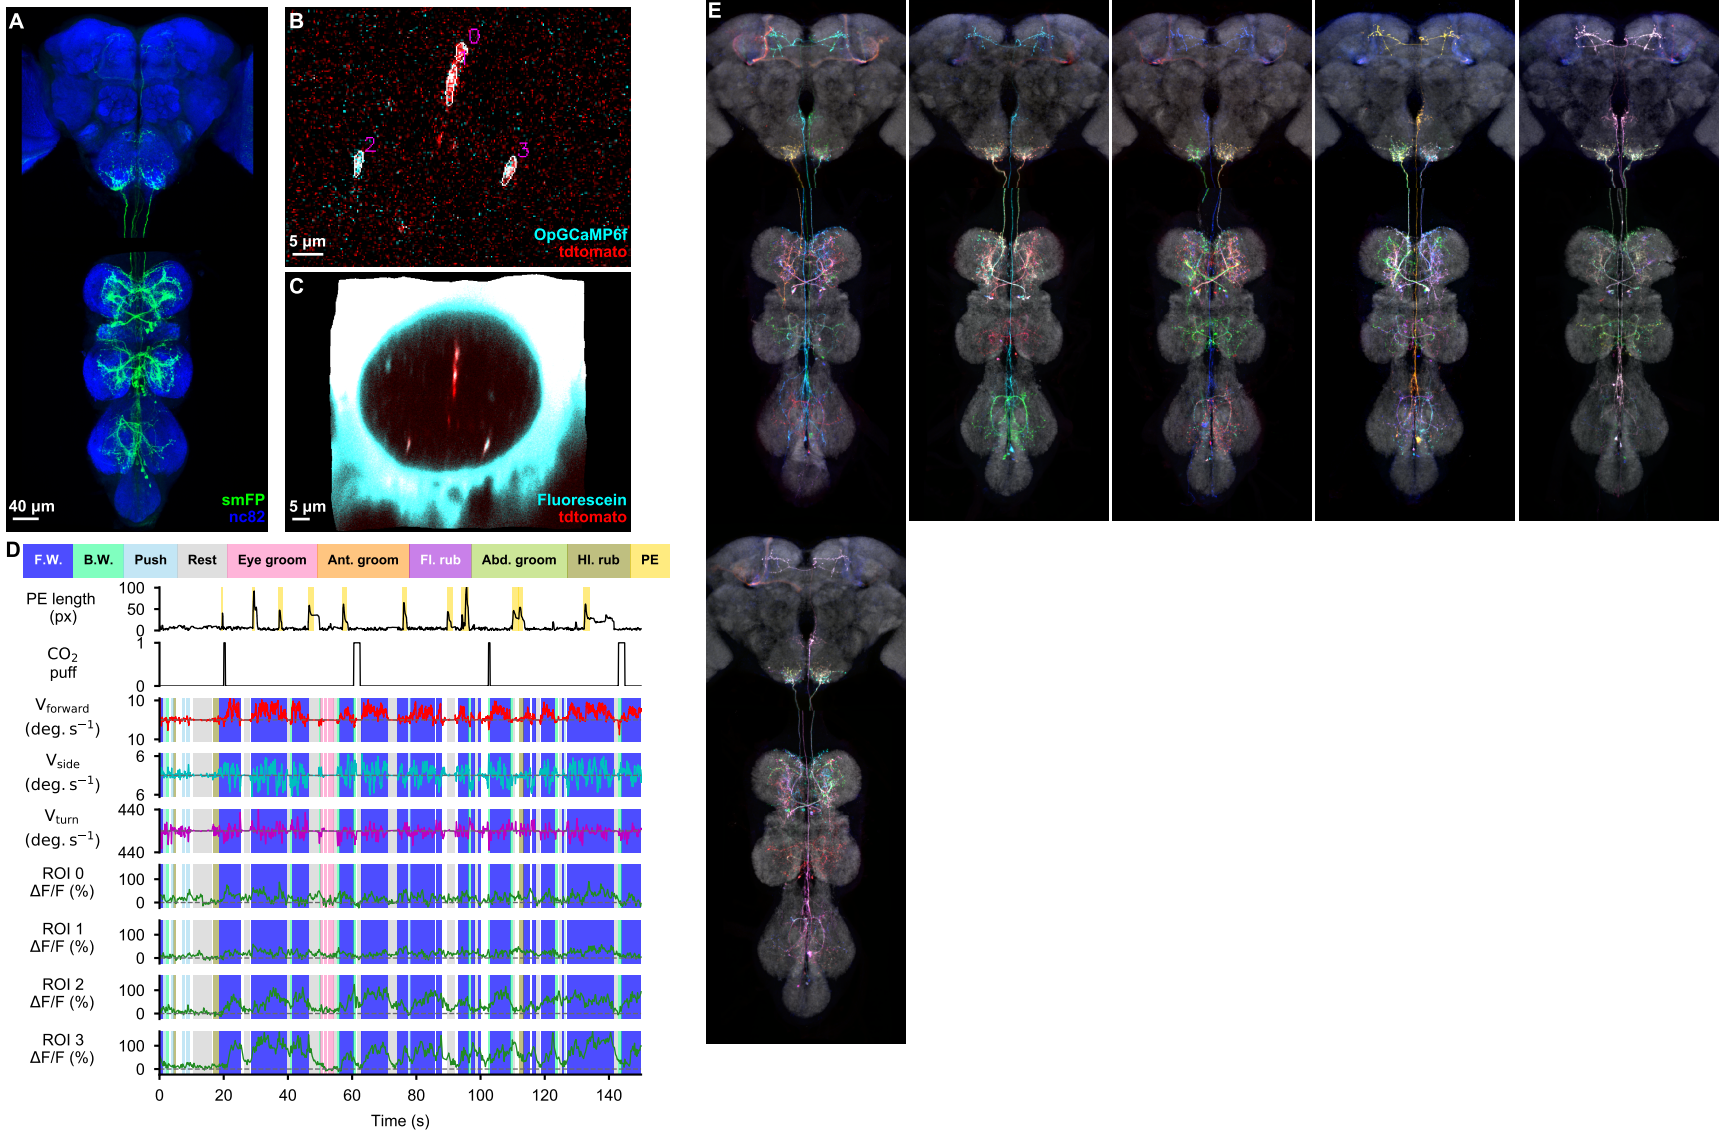



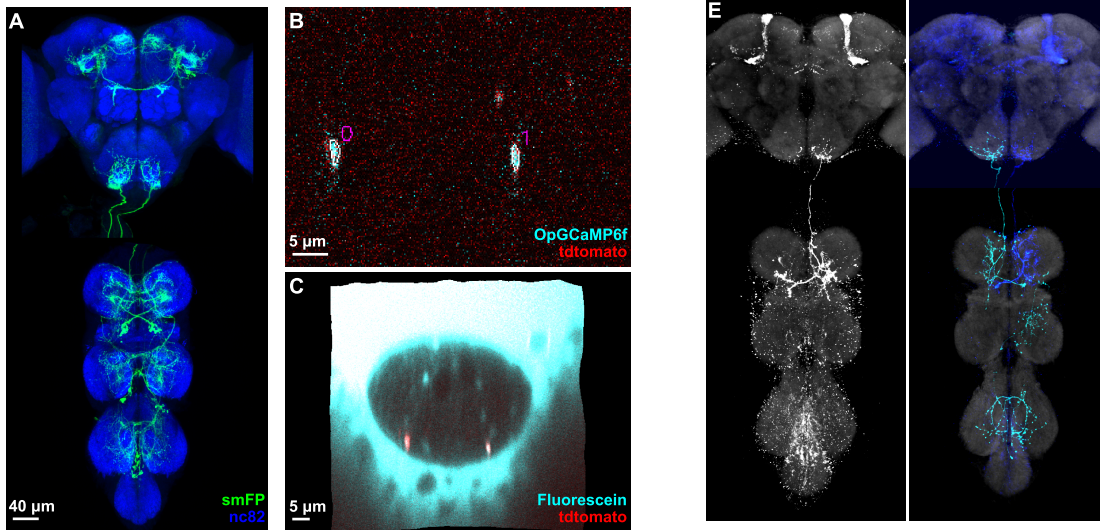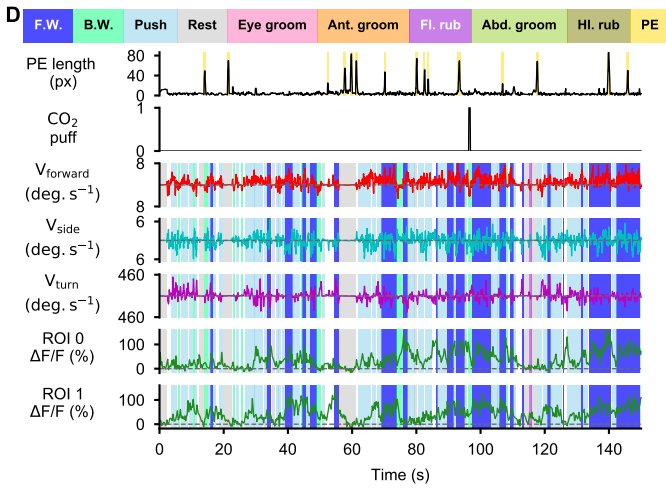

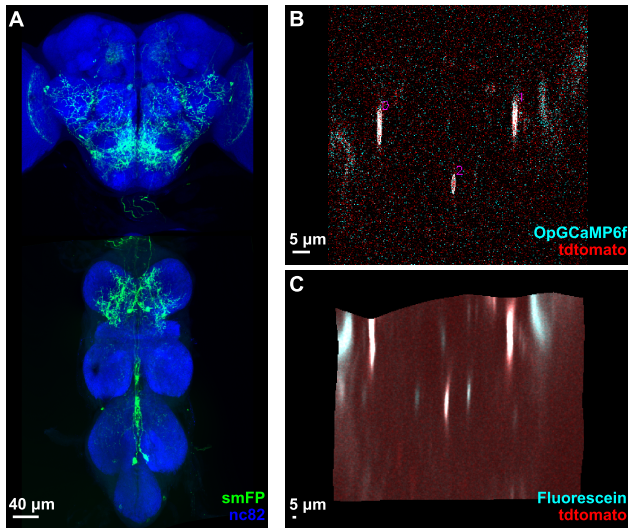

E

MCFO experiment was not performed.

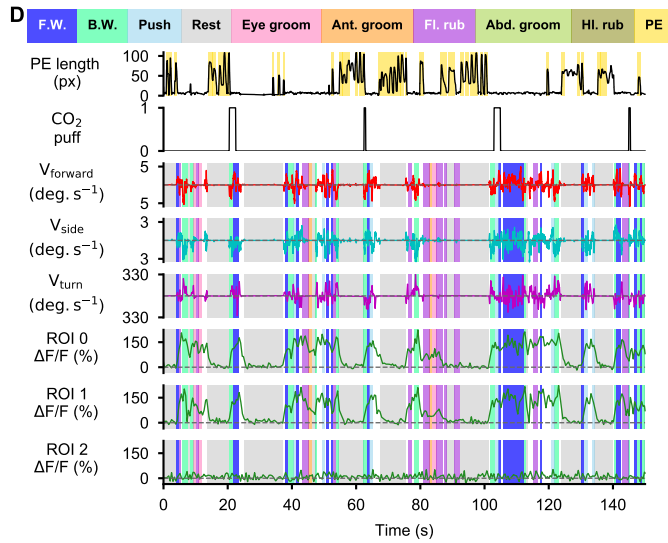

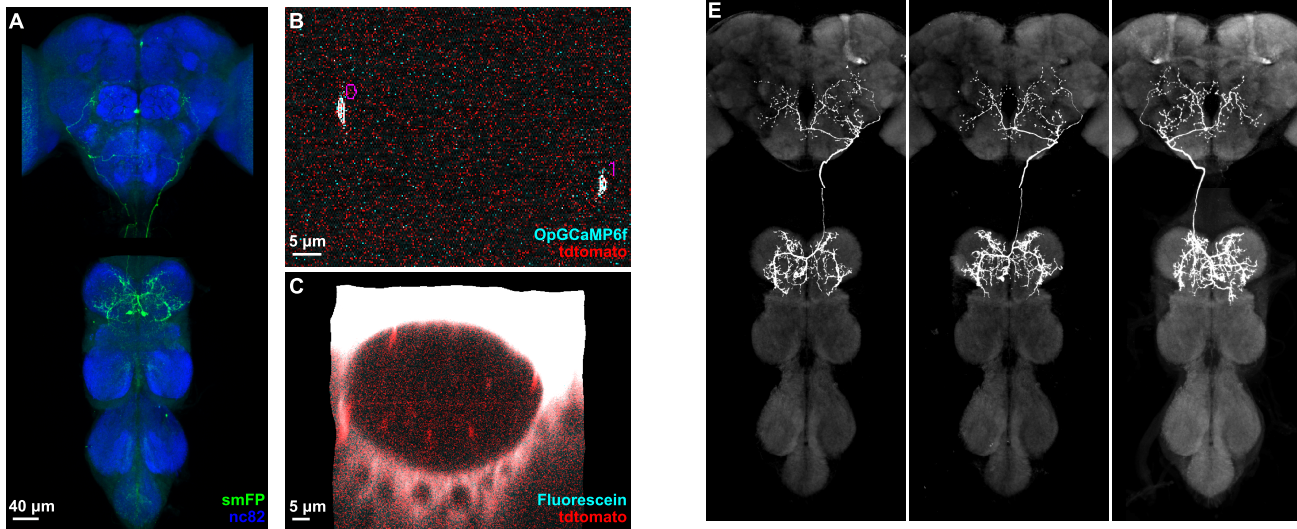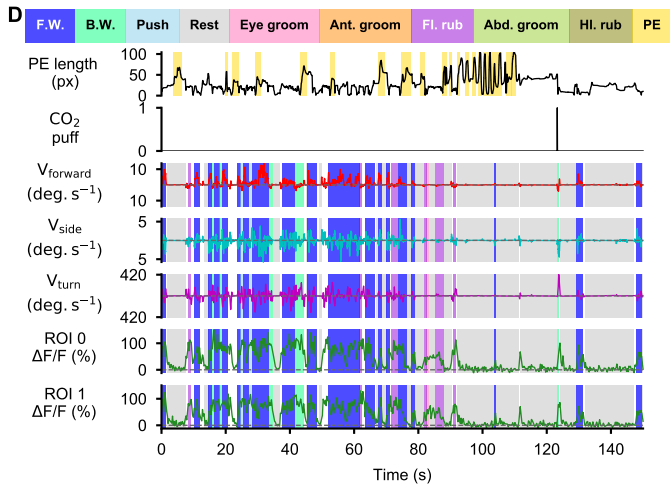

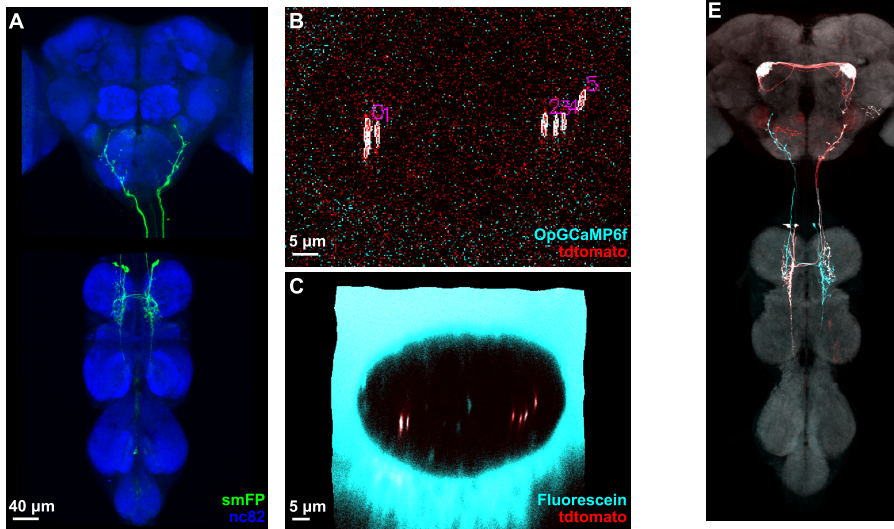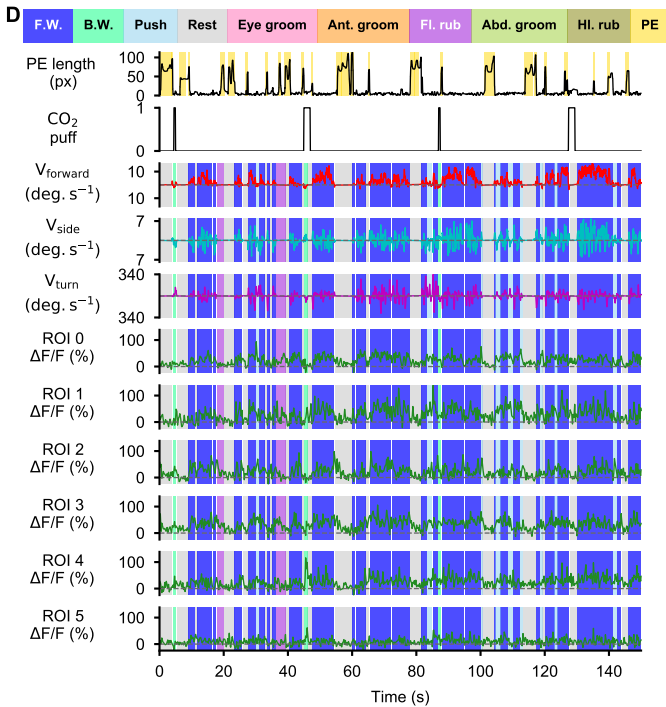

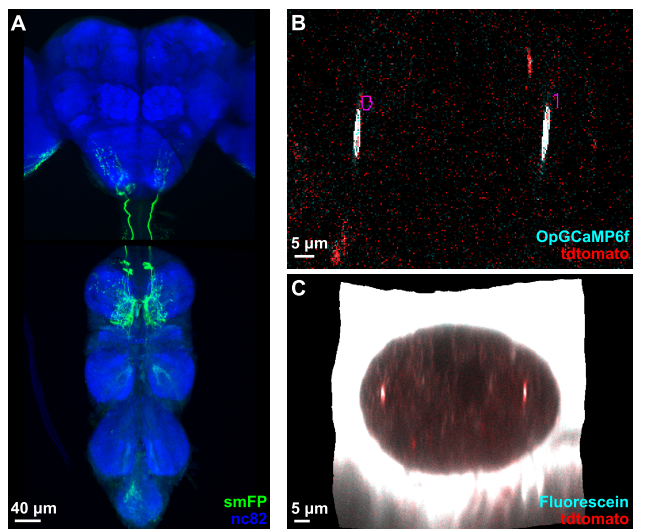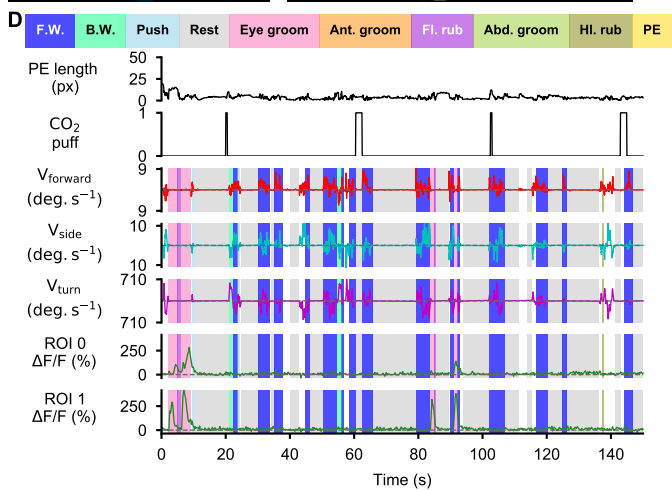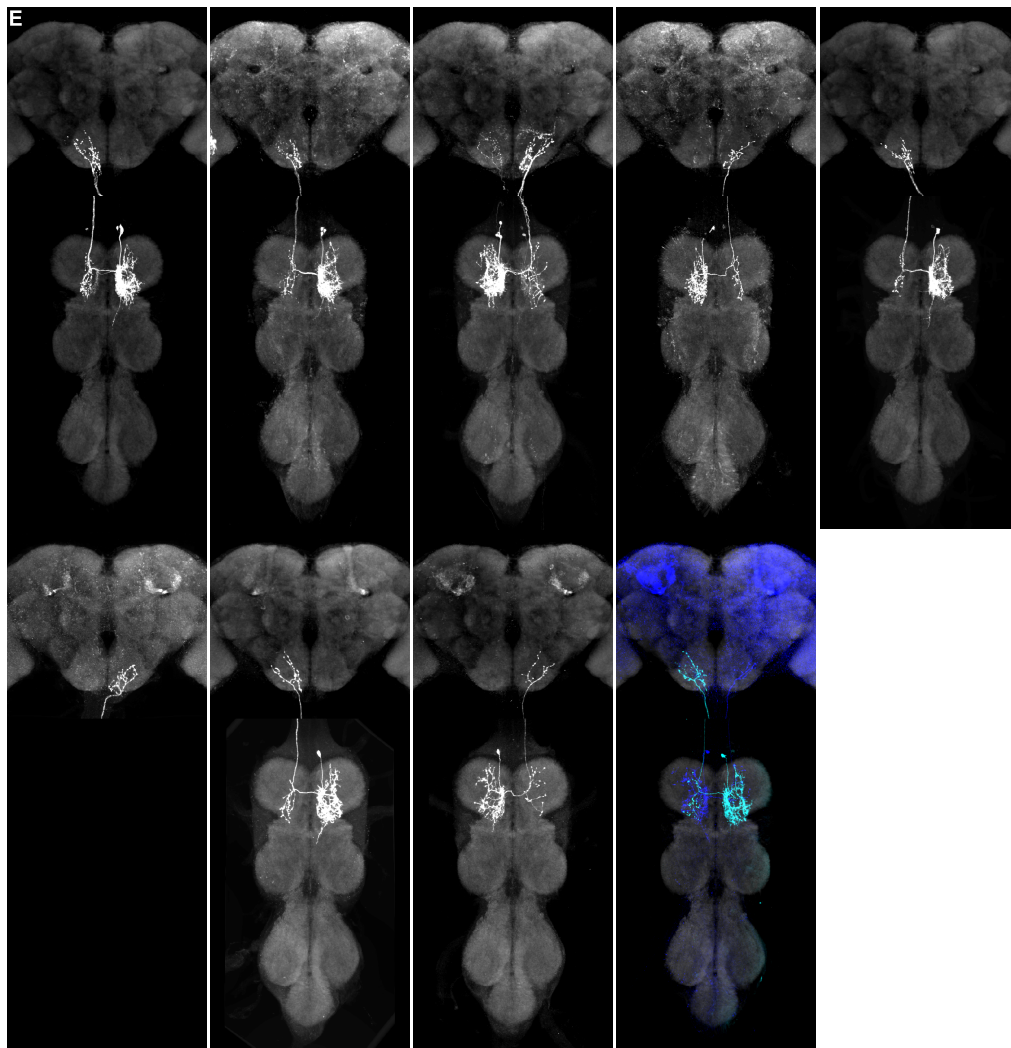



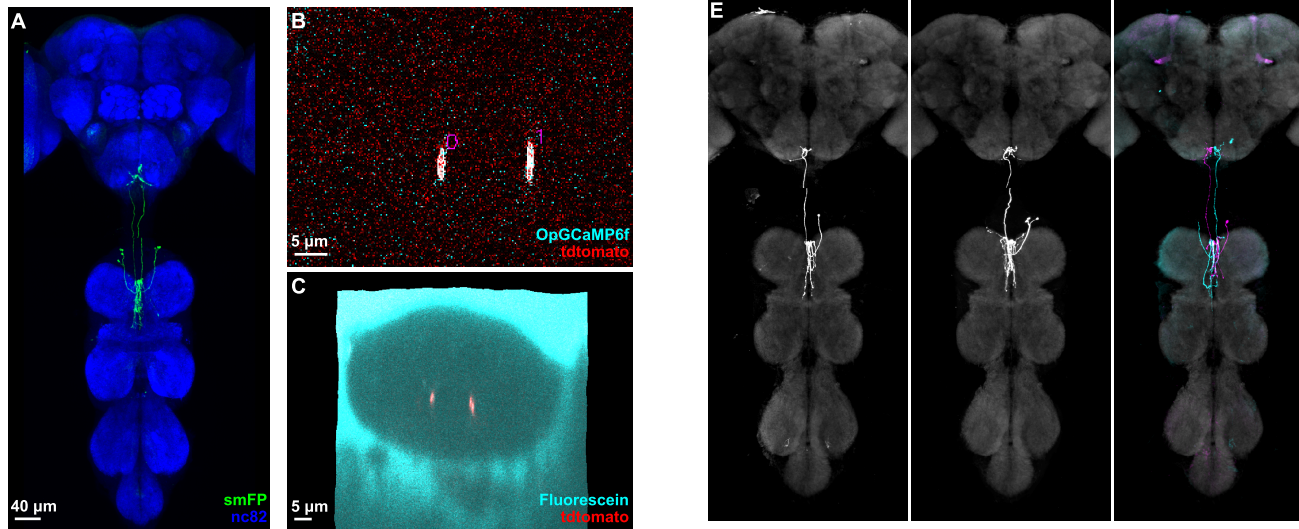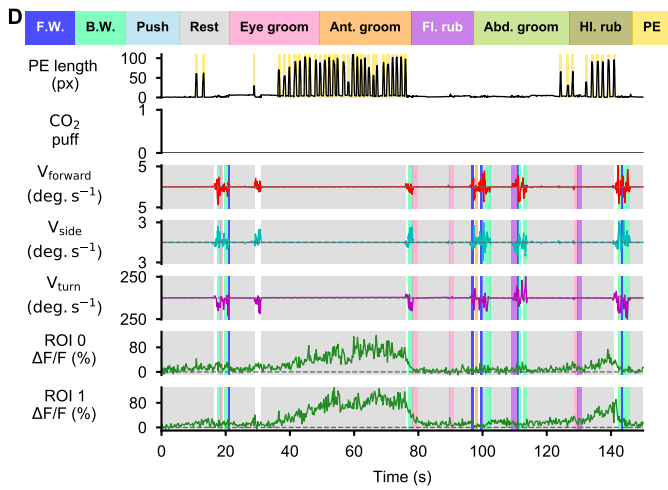

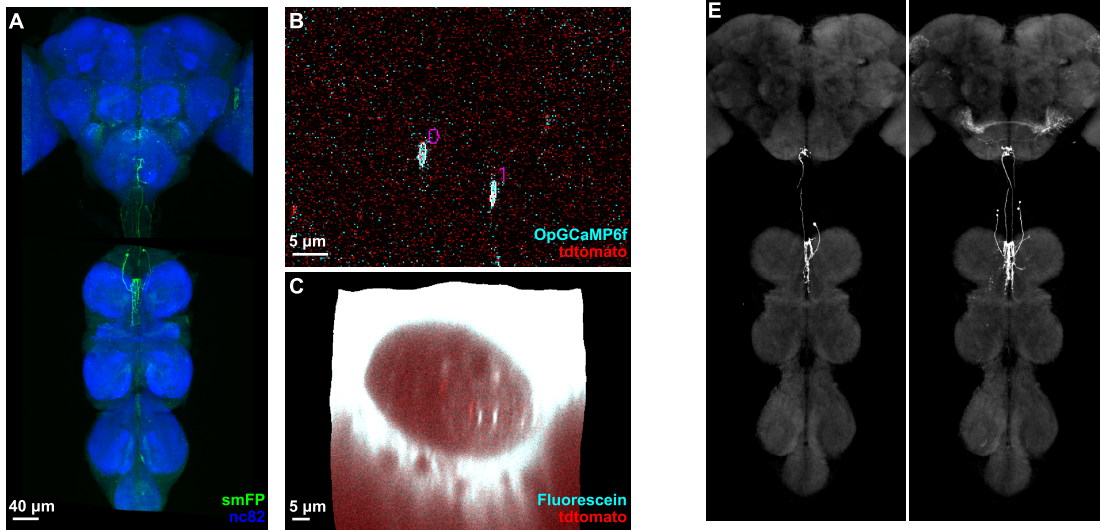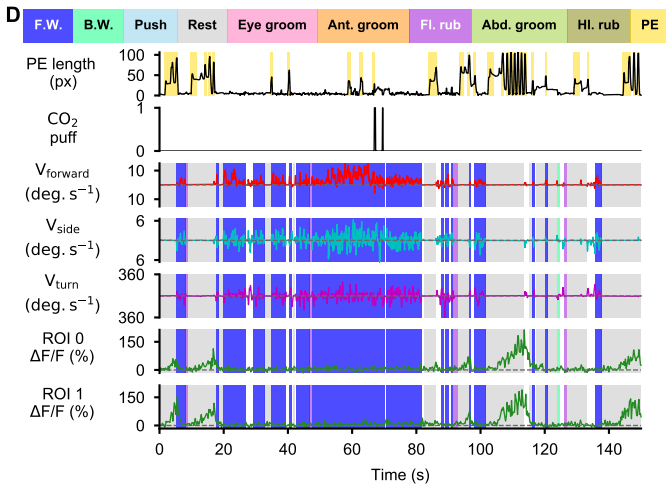

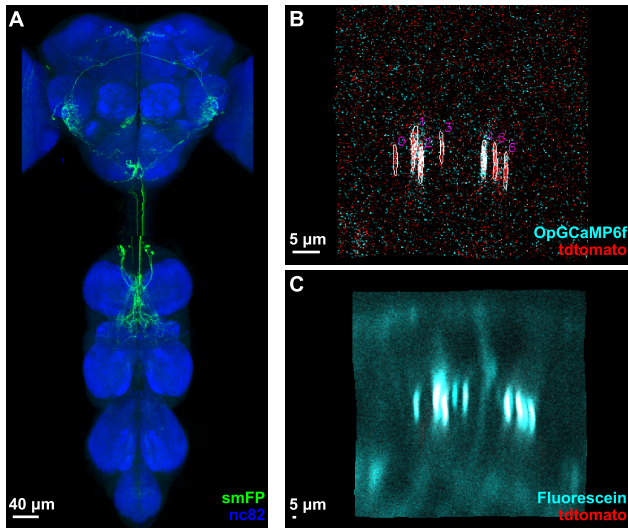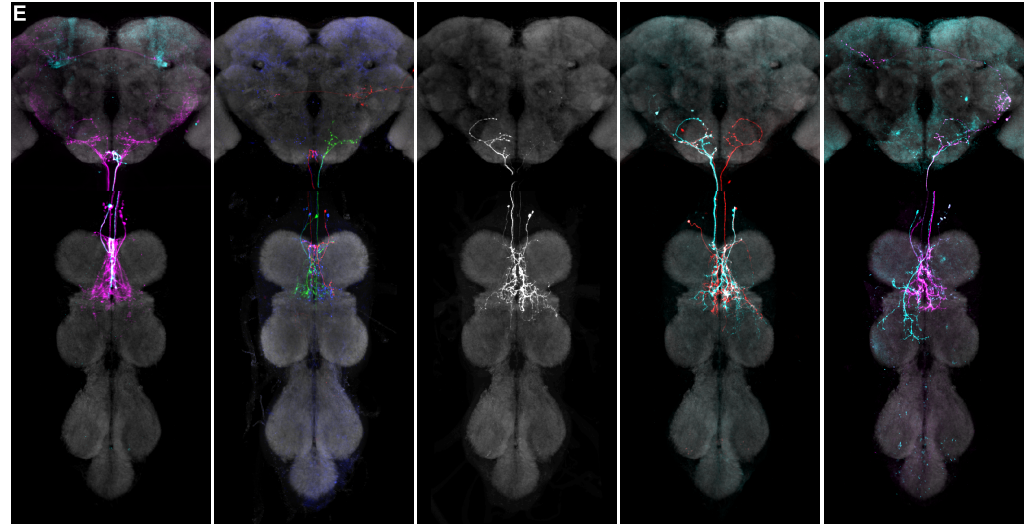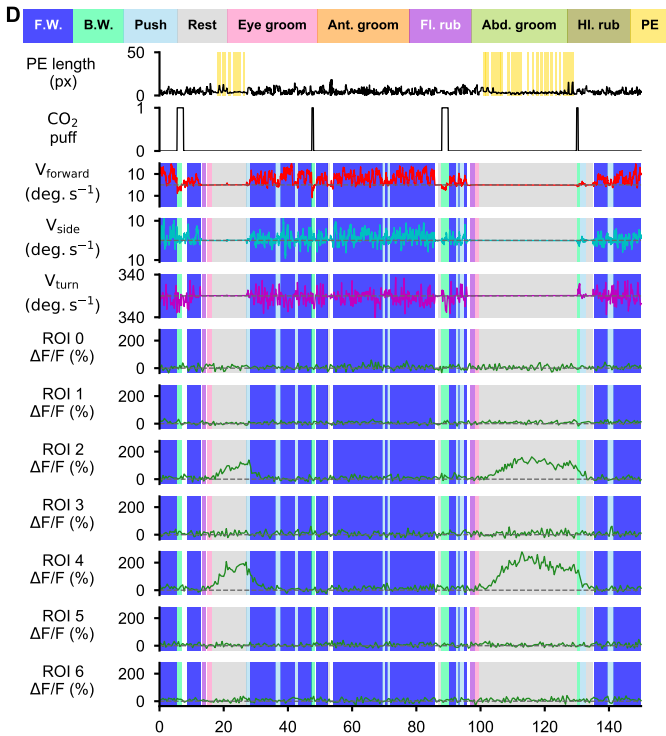

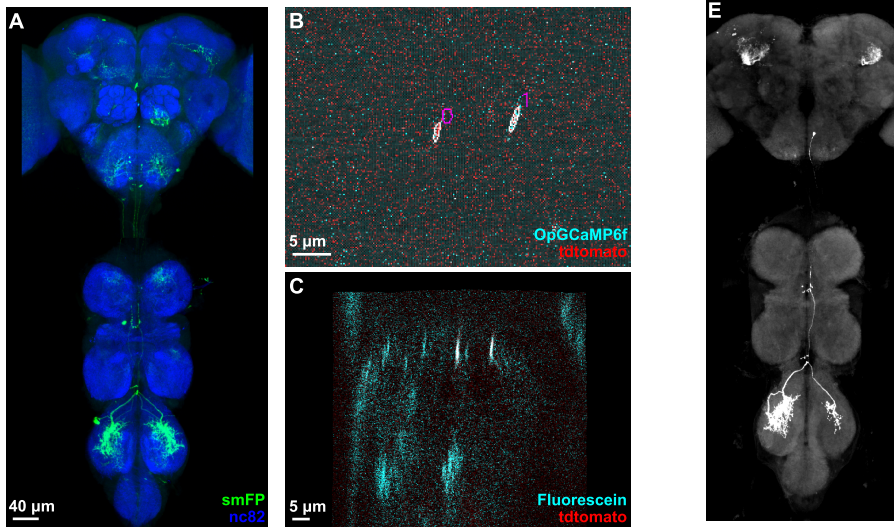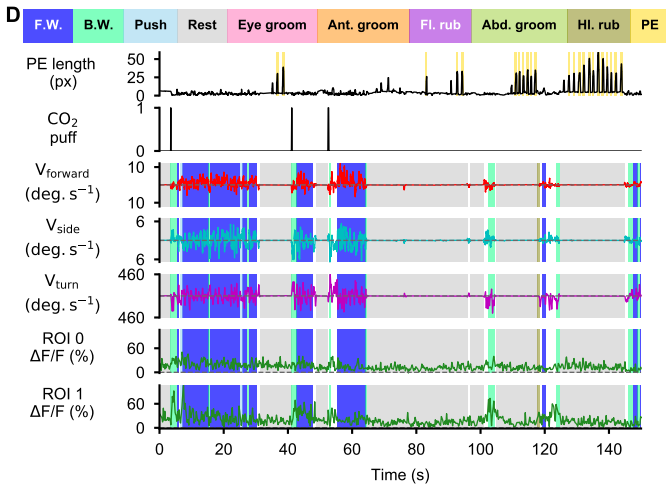



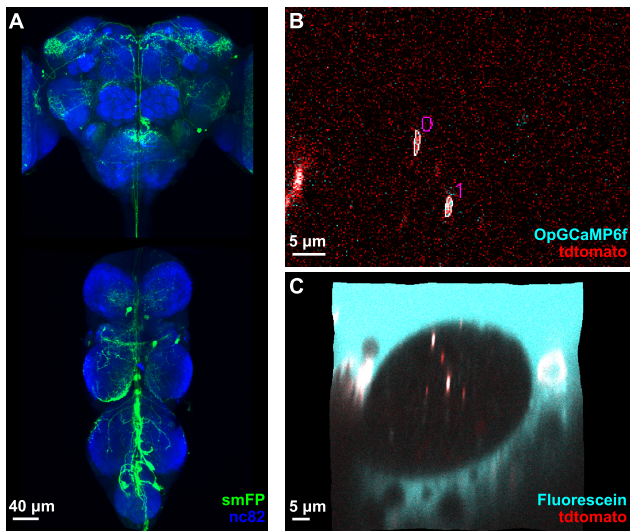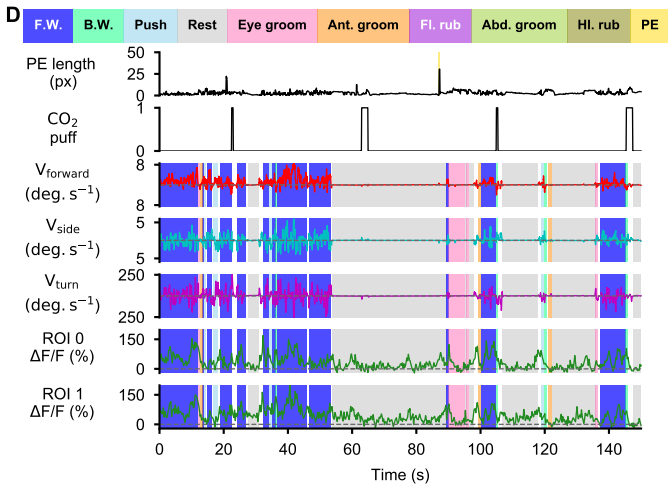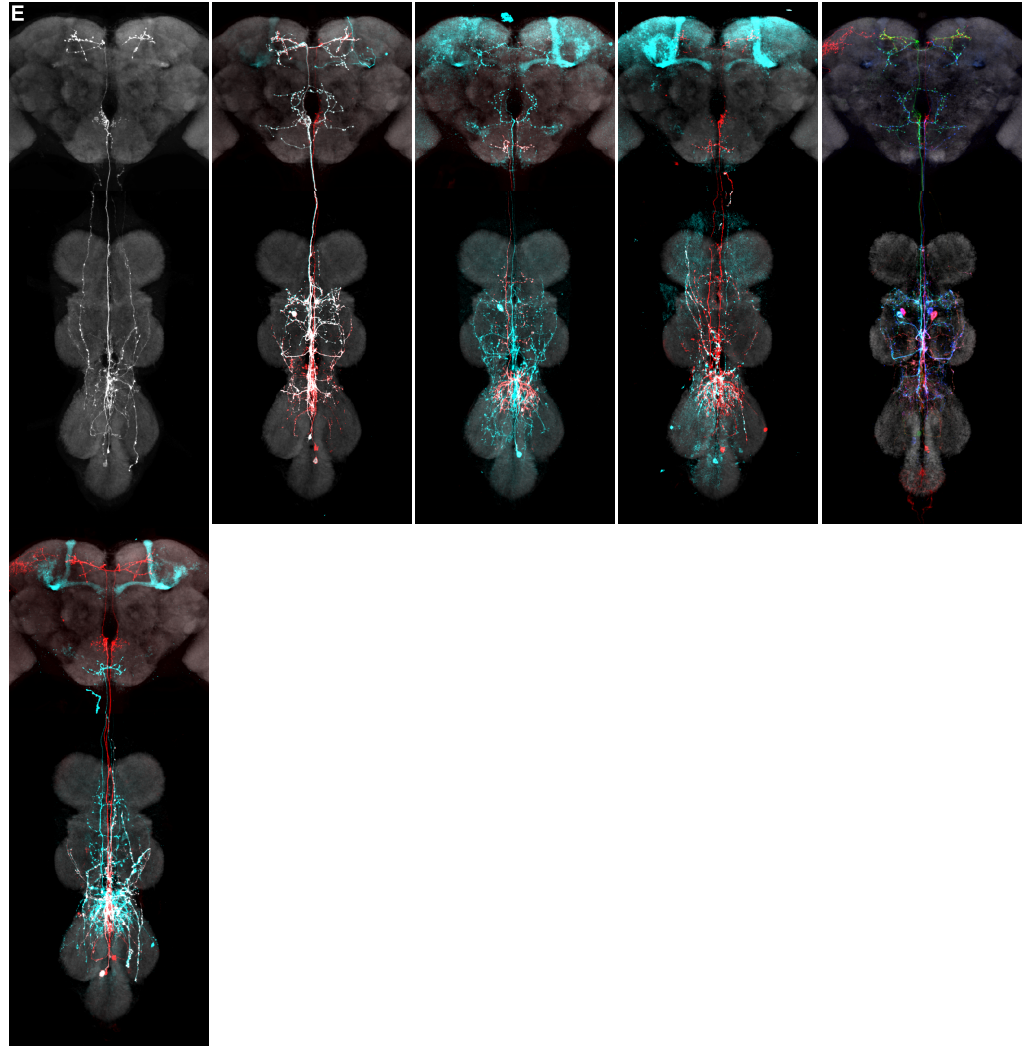



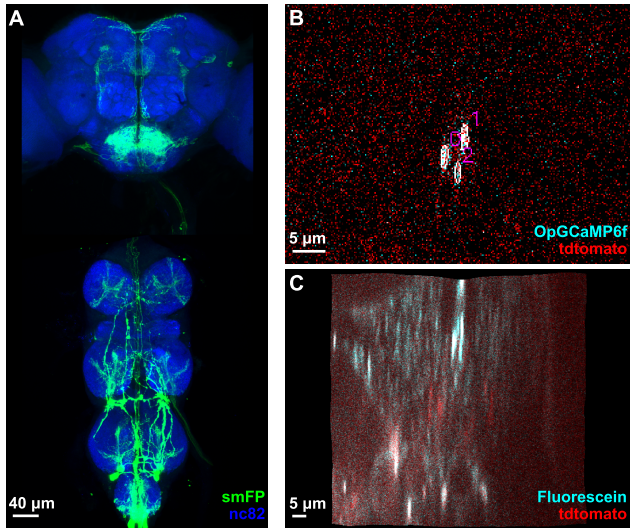

E

MCFO experiment was not performed.

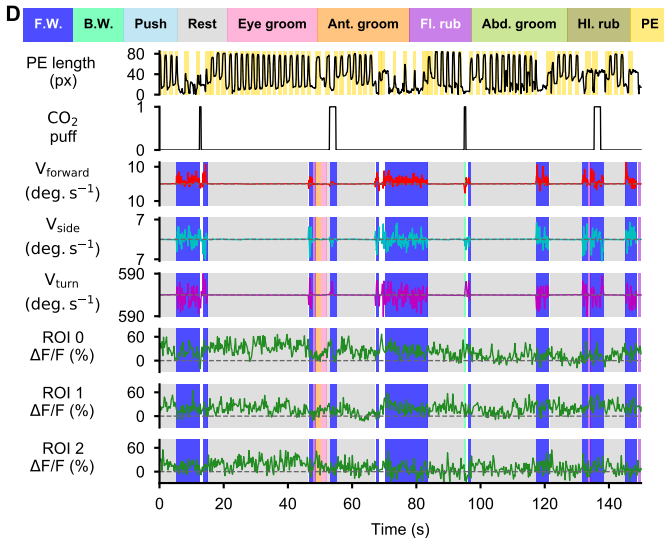

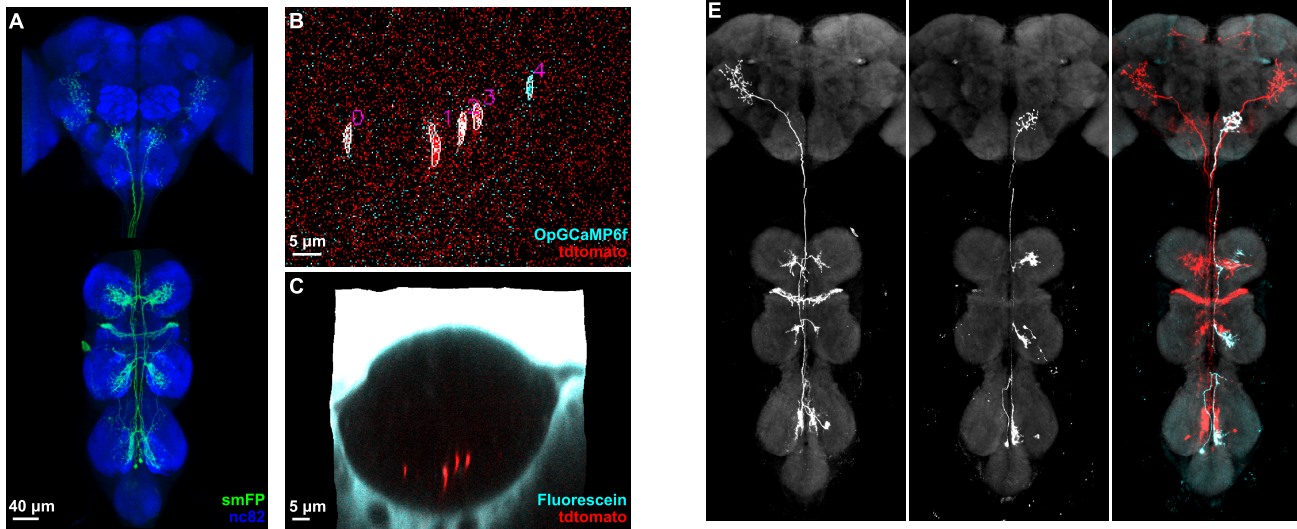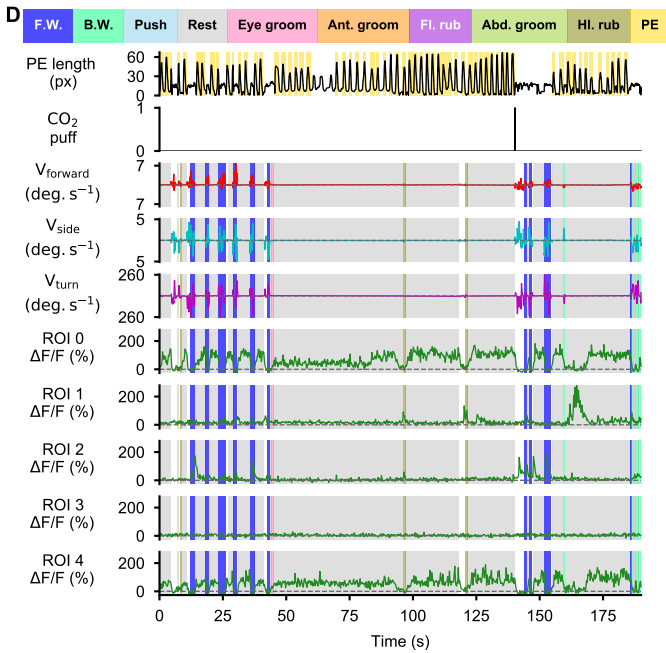

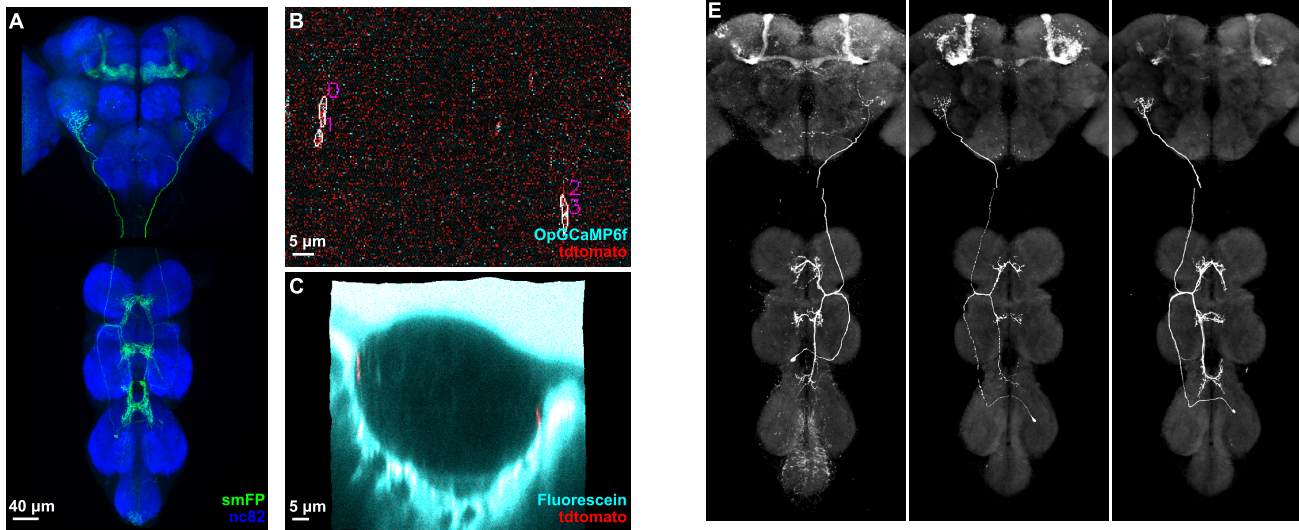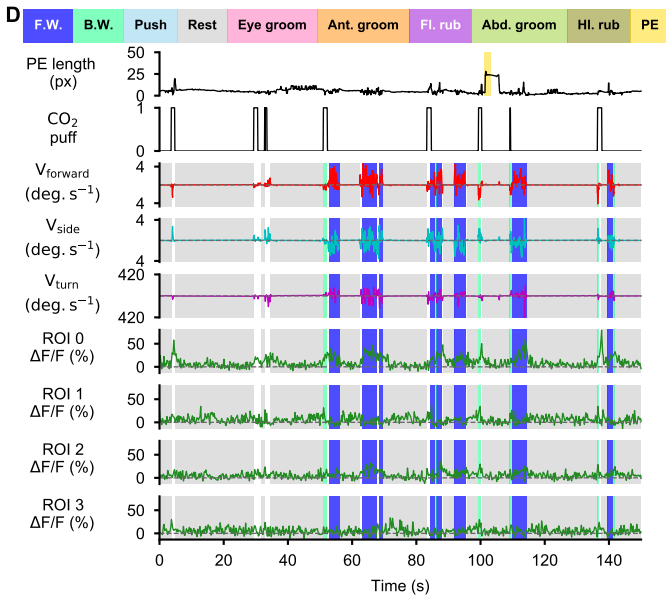

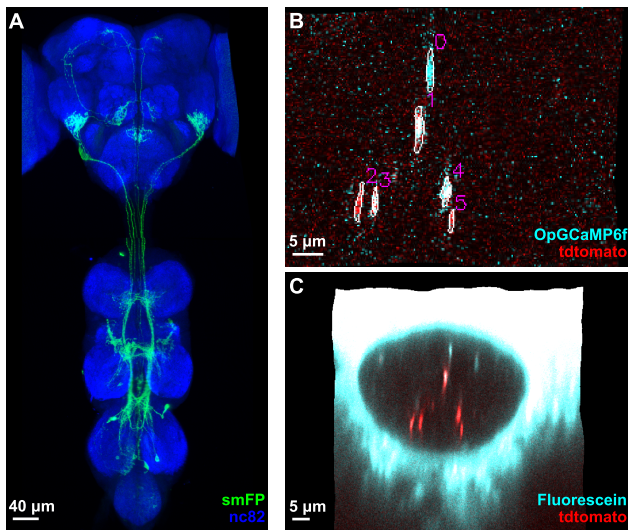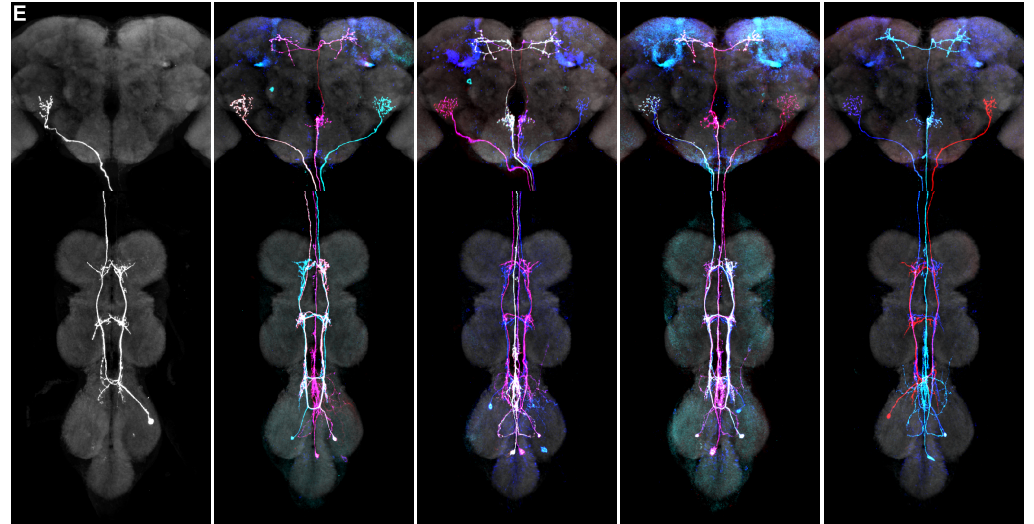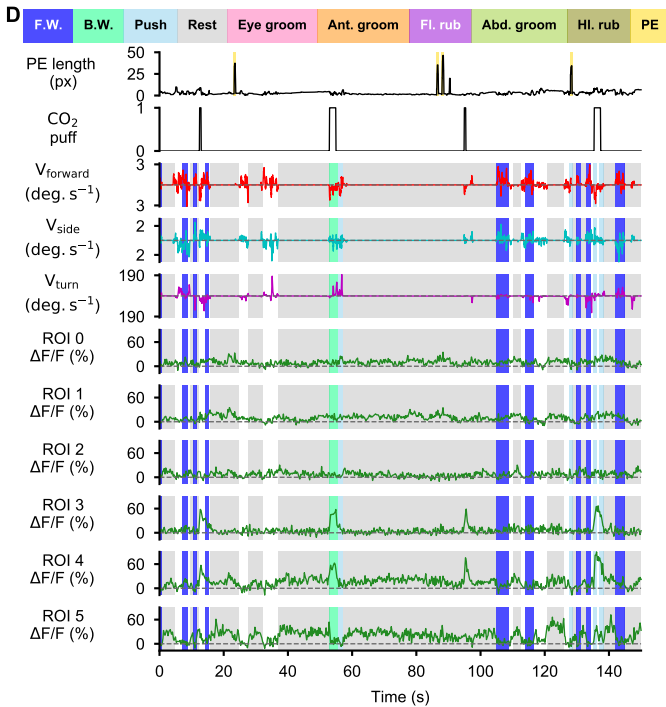



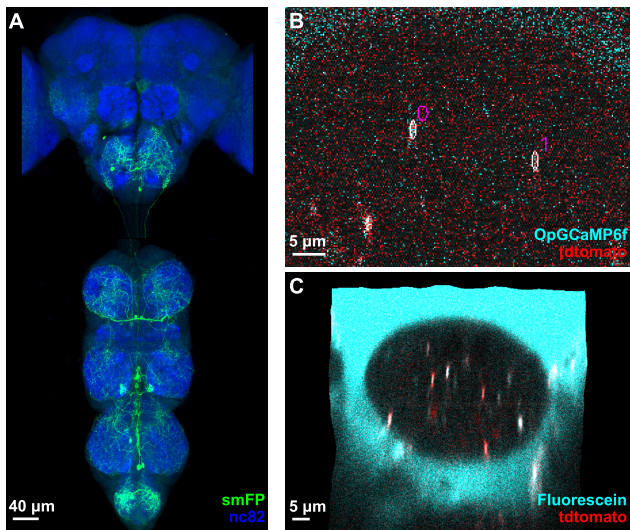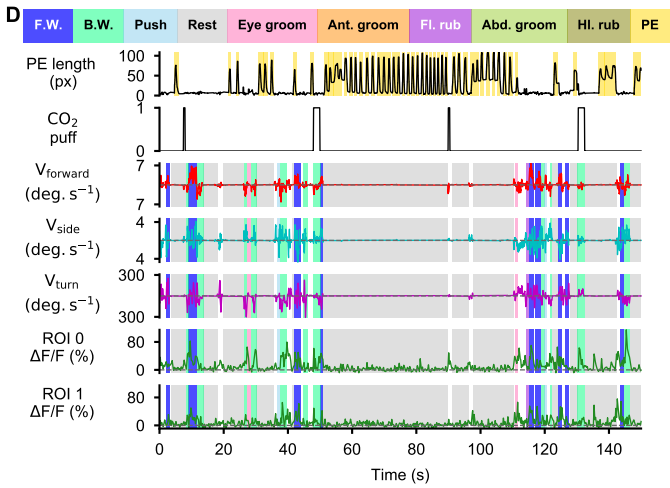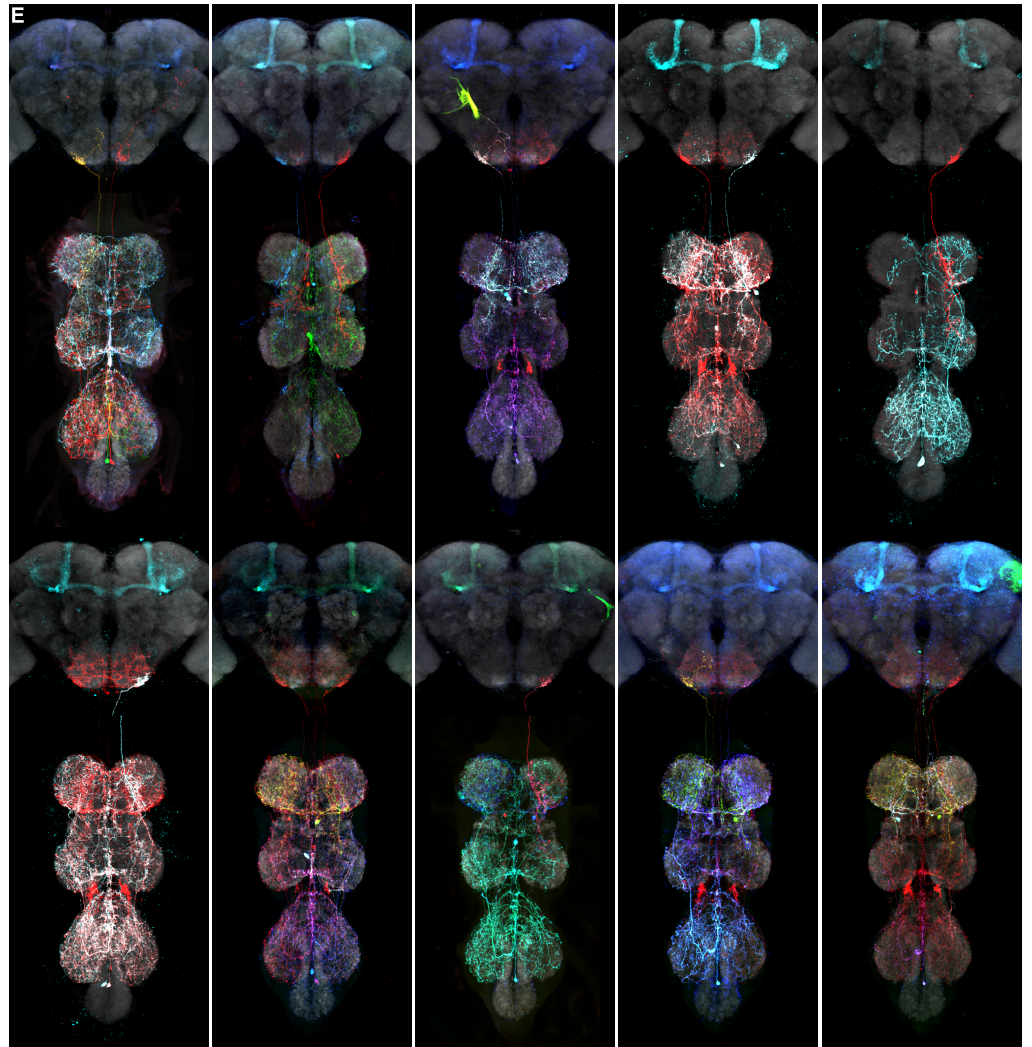



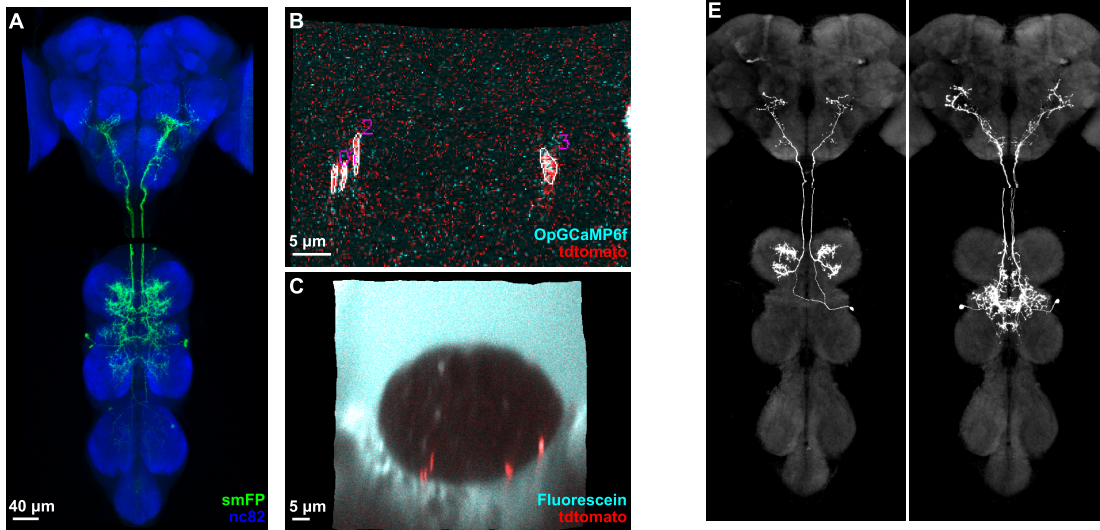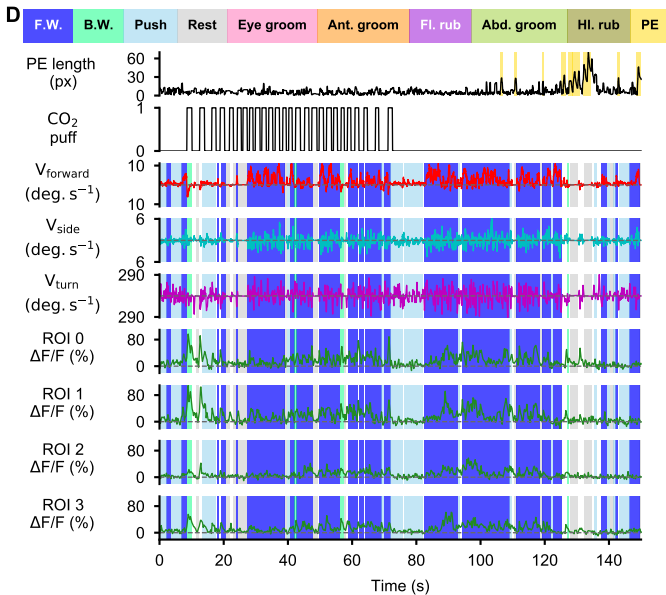

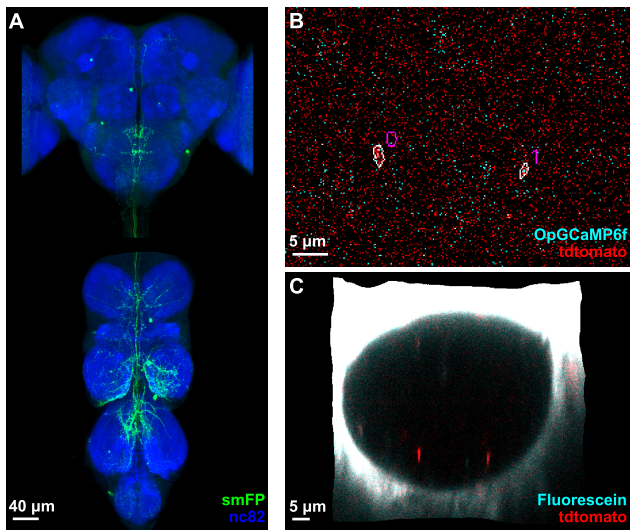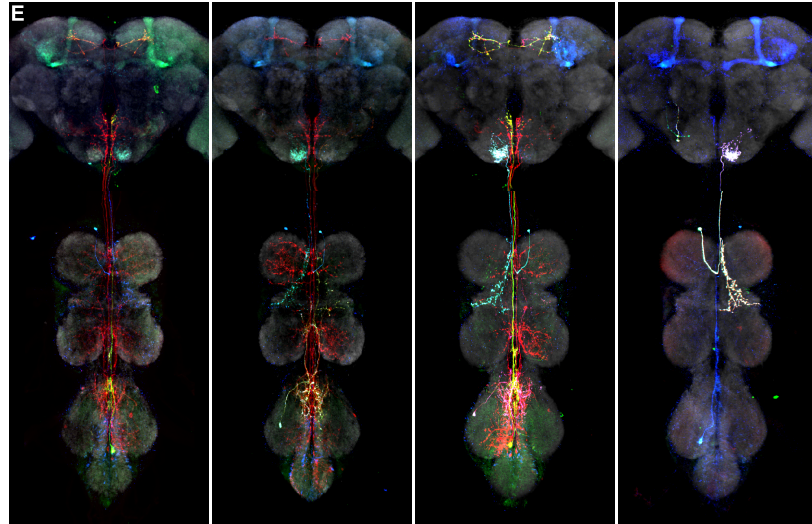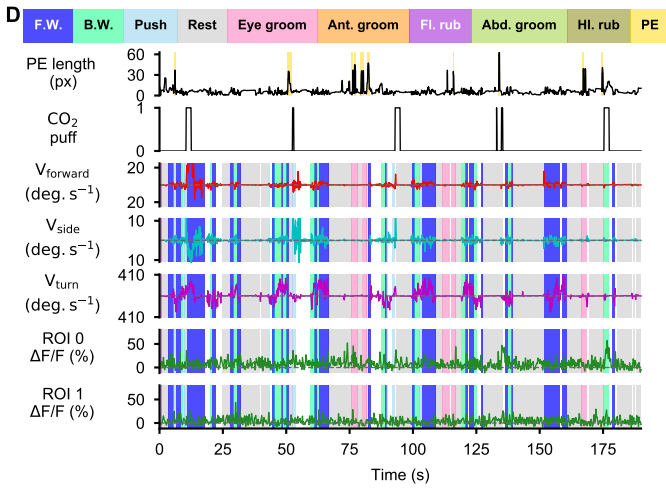

Supplement: 41593_2023_1281_MOESM5_ESM.pdf [file 41593_2023_1281_MOESM5_ESM.pdf]
