# Supplementary material for: Ascending neurons convey behavioral state to integrative sensory and action selection brain regions
Source: PubMed Central journal article supplement (PMC10076225; doi:10.1038/s41593-023-01281-z), 2023-03-23
Supplement: 41593_2023_1281_MOESM1_ESM.pdf [file 41593_2023_1281_MOESM1_ESM.pdf]

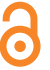

# Ascending neurons convey behavioral state to integrative sensory and action selection brain regions

---

In the format provided by the authors and unedited

**Supplementary Table 1: Sparse AN driver lines and associated properties.**

Supplementary videos (right-most column) for each driver line can be found here:

<https://dataverse.harvard.edu/dataverse/AN>

| No. | GAL4    | Confocal SNR of smFP | 2P SNR of OpGCaMP6f and tdTomato | Number ROIs (representative fly, separated by —) (other flies) | ROI# (left-right separated by —) | Encoding (left-right separated by —)                                    | Level synchronous activity (ROI# vs ROI#: Corr. coef.)                                 | Redundant GAL4                           | Supp. Video# |
|-----|---------|----------------------|----------------------------------|----------------------------------------------------------------|----------------------------------|-------------------------------------------------------------------------|----------------------------------------------------------------------------------------|------------------------------------------|--------------|
| 1   | SS36131 | strong               | strong                           | 2<br>(2,2)                                                     | 0<br>—<br>1                      | rest<br>—<br>rest                                                       | 0 vs 1 (pair): 0.7                                                                     | SS36132<br>SS36133                       | 3            |
| 2   | SS38592 | strong               | strong                           | 6<br>(5,4,3)                                                   | 0<br>1<br>2<br>3<br>—<br>4<br>5  | rest<br>rest<br>rest<br>rest<br>unclear<br>—<br>unclear<br>rest         | 0 vs 5: 0.4<br>1 vs 5: 0.36<br>2 vs 5: 0.49                                            | SS38598                                  | 4            |
| 3   | SS27485 | strong               | strong                           | 4<br>(6,2,2,4)                                                 | 0<br>1<br>—<br>2<br>3            | rest<br>rest<br>unclear<br>—<br>rest<br>rest                            | 0 vs 2 (pair): 0.85                                                                    | -                                        | 5            |
| 4   | SS41822 | strong               | strong                           | 2<br>(3)                                                       | 0<br>—<br>1                      | rest<br>—<br>rest                                                       | 0 vs 1 (pair): 0.71                                                                    | SS41808<br>SS41809<br>SS41820<br>SS41821 | 6            |
| 5   | SS38624 | strong               | strong                           | 4<br>(bifurcated)<br>(4,4)                                     | 0<br>1<br>—<br>2<br>3            | rest<br>rest<br>—<br>rest<br>rest                                       | 0 vs 2 (pair): 0.84<br>0 vs 3 (pair): 0.7<br>1 vs 2 (pair): 0.9<br>1 vs 3 (pair): 0.87 | -                                        | 7            |
| 6   | SS45605 | strong               | strong                           | 1<br>(1)                                                       | 0                                | unclear                                                                 | -                                                                                      | -                                        | 8            |
| 7   | SS43652 | strong               | medium                           | 5<br>(3,5)                                                     | 0<br>1<br>2<br>—<br>3<br>4       | rest<br>puff<br>rest<br>—<br>rest<br>rest                               | 0 vs 3: 0.91<br>0 vs 4: 0.84<br>2 vs 3: 0.77<br>2 vs 4: 0.89                           | -                                        | 9            |
| 8   | SS36112 | strong               | strong                           | 2<br>(2,2)                                                     | 0<br>—<br>1                      | puff<br>—<br>puff                                                       | 0 vs 1 (pair): 0.51                                                                    | -                                        | 10           |
| 9   | SS41806 | strong               | strong                           | 4<br>(3,4,4)                                                   | 0<br>2<br>—<br>1<br>3            | unclear<br>puff<br>—<br>unclear<br>puff                                 | 0 vs 1 (pair): 0.90<br>2 vs 3 (pair): 0.67                                             | -                                        | 11           |
| 10  | SS38631 | strong               | strong                           | 2<br>(1)                                                       | 0<br>—<br>1                      | off ball movement<br>—<br>off ball movement                             | 0 vs 1 (pair): 0.88                                                                    | -                                        | 12           |
| 11  | SS51029 | strong               | medium                           | 4<br>(4,3,4)                                                   | 0<br>1<br>—<br>2<br>3            | puff<br>puff<br>—<br>puff<br>puff                                       | 0 vs 2: 0.32<br>0 vs 3: 0.33<br>1 vs 2: 0.37<br>1 vs 3: 0.4                            | SS51024                                  | 13           |
| 12  | R85A11  | strong               | strong                           | 6<br>(6,6)                                                     | 0<br>2<br>3<br>—<br>1<br>4<br>5  | unresponsive<br>walk<br>unclear<br>—<br>unresponsive<br>walk<br>unclear | 2 vs 4 (pair): 0.87                                                                    | -                                        | 14           |
| 13  | SS40489 | -                    | strong                           | 5<br>(5)                                                       | 0<br>1<br>2<br>—<br>3<br>4       | unclear<br>unclear<br>unclear<br>—<br>unclear<br>unclear                | 0 vs 3: 0.38<br>0 vs 4: 0.43<br>1 vs 3: 0.53<br>1 vs 4: 0.53                           | -                                        | 15           |
| 14  | SS31480 | strong               | strong                           | 3<br>(3)                                                       | 0<br>1<br>2                      | walk<br>unclear<br>walk                                                 | 0 vs 2: 0.61                                                                           | -                                        | 16           |
| 15  | SS51021 | strong               | strong                           | 2<br>(2,2)                                                     | 0<br>—<br>1                      | foreleg movement<br>—<br>foreleg movement                               | 0 vs 1 (pair): 0.69                                                                    | -                                        | 17           |
| 16  | SS51017 | strong               | strong                           | 2<br>(2,4,2)                                                   | 0<br>—<br>1                      | off ball movement<br>—<br>off ball movement                             | 0 vs 1 (pair): 0.67                                                                    | -                                        | 18           |
| 17  | SS31456 | strong               | strong                           | 2<br>(2,2,2)                                                   | 0<br>—<br>1                      | off ball movement<br>—<br>off ball movement                             | 0 vs 1 (pair): 0.20                                                                    | -                                        | 19           |
| 18  | SS46233 | strong               | medium                           | 2<br>(2,3,3,2)                                                 | 0<br>—<br>1                      | walk<br>—<br>walk                                                       | 0 vs 1 (pair): 0.63                                                                    | -                                        | 20           |

Table 1 continued from previous page

| No. | GAL4    | Confocal SNR of smFP | 2P SNR of OpGCaMP6f and tdTomato | Number ROIs (representative fly, separated (other flies)) | ROI# (left-right separated by —) | Encoding (left-right separated by —)                                                                                      | Level synchronous activity (ROI# vs ROI#: Corr. coef.)                                                                     | Redundant GAL4                | Supp. Video# |
|-----|---------|----------------------|----------------------------------|-----------------------------------------------------------|----------------------------------|---------------------------------------------------------------------------------------------------------------------------|----------------------------------------------------------------------------------------------------------------------------|-------------------------------|--------------|
| 19  | SS42749 | strong               | strong                           | 2<br>(2,2)                                                | 0<br>—<br>1                      | push<br>—<br>push                                                                                                         | 0 vs 1 (pair): 0.89                                                                                                        | -                             | 21           |
| 20  | SS41815 | strong               | medium                           | 2<br>(2,2,2)                                              | 0<br>—<br>1                      | unclear<br>—<br>unclear                                                                                                   | 0 vs 1 (pair): 0.42                                                                                                        | -                             | 22           |
| 21  | SS29633 | strong               | strong                           | 3<br>(3,2)                                                | 0<br>1<br>2                      | unclear<br>unclear<br>unclear                                                                                             | 0 vs 1: 0.11<br>0 vs 2: 0.41<br>1 vs 2: 0.42                                                                               | -                             | 23           |
| 22  | R87H02  | strong               | strong                           | 2<br>(2,2,2)                                              | 0<br>—<br>1                      | —<br>—<br>unclear                                                                                                         | 0 vs 1 (pair): 0.48                                                                                                        | -                             | 24           |
| 23  | MAN     | strong               | strong                           | 2<br>(2,2,3,3,2)                                          | 0<br>—<br>1                      | push<br>—<br>push                                                                                                         | 0 vs 1 (pair): 0.82                                                                                                        | -                             | 25           |
| 24  | SS49172 | strong               | strong                           | 3<br>(2,5,3)                                              | 0<br>—<br>1<br>2                 | —<br>—<br>walk<br>walk                                                                                                    | 0 vs 1: 0.54<br>0 vs 2: 0.53                                                                                               | -                             | 26           |
| 25  | R36G04  | strong               | strong                           | 2<br>(4,3,3,3)                                            | 0<br>—<br>1                      | —<br>—<br>walk                                                                                                            | 0 vs 1 (pair): 0.55                                                                                                        | -                             | 27           |
| 26  | R39G01  | strong               | strong                           | 3<br>(3,2,3,3)                                            | 0<br>1<br>2                      | unclear<br>unclear<br>unclear                                                                                             | 0 vs 1: 0.09<br>0 vs 2: 0.82<br>1 vs 2: 0.19                                                                               | -                             | 28           |
| 27  | SS31219 | strong               | strong                           | 3<br>(4,3,3)                                              | 0<br>—<br>1<br>2                 | —<br>—<br>walk<br>walk<br>walk                                                                                            | 0 vs 1: 0.67<br>0 vs 2: 0.74                                                                                               | -                             | 29           |
| 28  | R30A08  | strong               | medium                           | 2<br>(1,2,2,1)                                            | 0<br>—<br>1                      | unclear<br>—<br>unclear                                                                                                   | 0 vs 1 (pair): 0.22                                                                                                        | -                             | 30           |
| 29  | SS44270 | strong               | strong                           | 3<br>(1,2)                                                | 0<br>—<br>1<br>2                 | walk<br>—<br>walk<br>unresponsive                                                                                         | 0 vs 1 (pair): 0.98                                                                                                        | SS41605                       | 31           |
| 30  | SS41605 | strong               | strong                           | 4<br>(4,4)                                                | 0<br>2<br>—<br>1<br>3            | unclear<br>push<br>—<br>unclear<br>push                                                                                   | 0 vs 1 (pair): 0.90<br>2 vs 3 (pair): 0.94                                                                                 | SS44270                       | 32           |
| 31  | SS29579 | strong               | strong                           | 6<br>(6,8)                                                | 0<br>1<br>5<br>—<br>2<br>3<br>4  | walk<br>walk<br>walk<br>—<br>walk<br>walk<br>unresponsive                                                                 | 0 vs 2: 0.84<br>0 vs 3 (pair): 0.89<br>1 vs 2 (pair): 0.78<br>1 vs 3: 0.87                                                 | -                             | 33           |
| 32  | SS51046 | medium               | strong                           | 2<br>(2,2)                                                | 0<br>—<br>1                      | turn<br>—<br>turn                                                                                                         | 0 vs 1 (pair): 0.48                                                                                                        | -                             | 34           |
| 33  | SS29893 | strong               | strong                           | 4<br>(4)                                                  | 0<br>2<br>—<br>1<br>3            | unclear<br>turn<br>—<br>unclear<br>turn                                                                                   | 0 vs 1 (pair): 0.60<br>2 vs 3 (pair): 0.62                                                                                 | SS34574                       | 35           |
| 34  | SS34574 | strong               | strong                           | 2<br>(2)                                                  | 0<br>—<br>1                      | turn<br>—<br>turn                                                                                                         | 0 vs 1 (pair): 0.44                                                                                                        | SS29893                       | 36           |
| 35  | R70H06  | strong               | strong                           | 3<br>(2,2)                                                | 0<br>—<br>1<br>2                 | foreleg movement<br>—<br>foreleg movement<br>unresponsive                                                                 | 0 vs 1 (pair): 0.98                                                                                                        | SS42740<br>SS42707            | 37           |
| 36  | SS42740 | strong               | strong                           | 2<br>(2,2)                                                | 0<br>—<br>1                      | foreleg movement<br>—<br>foreleg movement                                                                                 | 0 vs 1 (pair): 0.97                                                                                                        | R70H06<br>SS42707             | 38           |
| 37  | SS28596 | strong               | strong                           | 6<br>(4,5,5,4)                                            | 0<br>1<br>—<br>2<br>3<br>4<br>5  | foreleg movement<br>foreleg movement<br>—<br>foreleg movement<br>foreleg movement<br>foreleg movement<br>foreleg movement | 0 vs 2: 0.4<br>0 vs 3: 0.65<br>0 vs 4: 0.61<br>0 vs 5: 0.21<br>1 vs 2: 0.52<br>1 vs 3: 0.5<br>1 vs 4: 0.46<br>1 vs 5: 0.28 | R86H08                        | 39           |
| 38  | SS25469 | strong               | strong                           | 2<br>(3,5,3)                                              | 0<br>—<br>1                      | eye groom<br>—<br>eye groom                                                                                               | 0 vs 1 (pair): 0.75                                                                                                        | SS52106<br>SS52107<br>SS52108 | 40           |
| 39  | SS31232 | strong               | strong                           | 2<br>(2,2,2,2,2,2,2,2)                                    | 0<br>—<br>1                      | proboscis extension<br>—<br>proboscis extension                                                                           | 0 vs 1 (pair): 0.81                                                                                                        | SS30303<br>SS25451            | 41           |

Table 1 continued from previous page

| No. | GAL4    | Confocal SNR of smFP | 2P SNR of OpGCaMP6f and tdTomato | Number ROIs (representative fly, separated (other flies)) | ROI# (left-right separated by —)     | Encoding (left-right separated by —)                                                                                            | Level synchronous activity (ROI# vs ROI#: Corr. coef.)                                     | Redundant GAL4     | Supp. Video# |
|-----|---------|----------------------|----------------------------------|-----------------------------------------------------------|--------------------------------------|---------------------------------------------------------------------------------------------------------------------------------|--------------------------------------------------------------------------------------------|--------------------|--------------|
| 40  | SS30303 |                      | strong                           | 2<br>(2,2)                                                | 0<br>—<br>1                          | proboscis extension<br>—<br>proboscis extension                                                                                 | 0 vs 1 (pair): 0.89                                                                        | SS31232<br>SS25451 | 42           |
| 41  | SS25451 | strong               | strong                           | 7<br>(5,6,6,6)                                            | 0<br>1<br>2<br>3<br>—<br>4<br>5<br>6 | unresponsive<br>unresponsive<br>proboscis extension<br>unresponsive<br>—<br>proboscis extension<br>unresponsive<br>unresponsive | 2 vs 4 (pair): 0.93                                                                        | SS31232<br>SS30303 | 43           |
| 42  | SS40134 | strong               | medium                           | 2<br>(2,2,2)                                              | 0<br>—<br>1                          | unclear<br>unclear                                                                                                              | 0 vs 1 (pair): 0.34                                                                        | -                  | 44           |
| 43  | SS29621 | strong               | strong                           | 2<br>(5,4)                                                | 0<br>—<br>1                          | walk<br>walk                                                                                                                    | 0 vs 1 (pair): 0.74                                                                        | -                  | 45           |
| 44  | R69H10  | strong               | strong                           | 3<br>(3)                                                  | 0<br>1<br>2                          | unclear<br>unclear<br>unclear                                                                                                   | 0 vs 1: 0.21<br>0 vs 2: 0.07<br>1 vs 2: 0.02                                               | -                  | 46           |
| 45  | SS51038 | strong               | strong                           | 5<br>(5,3)                                                | 0<br>1<br>—<br>2<br>3<br>4           | rest<br>unclear<br>—<br>unclear<br>unresponsive<br>rest                                                                         | 0 vs 2: -0.41<br>0 vs 4 (pair): 0.86<br>2 vs 4: -0.43                                      | -                  | 47           |
| 46  | SS42008 | strong               | strong                           | 4<br>(2,4,2)                                              | 0<br>1<br>—<br>2<br>3                | walk<br>unclear<br>—<br>walk<br>unclear                                                                                         | 0 vs 2 (pair): 0.53                                                                        | SS42007            | 48           |
| 47  | SS36118 | strong               | strong                           | 6<br>(7,4,6,6,7)                                          | 0<br>2<br>3<br>—<br>1<br>4<br>5      | unclear<br>unresponsive<br>puff<br>—<br>unclear<br>puff<br>rest                                                                 | 0 vs 1 (pair): 0.83<br>2 vs 4: 0.25<br>2 vs 5: 0.12<br>3 vs 4 (pair): 0.75<br>3 vs 5: 0.27 | -                  | 49           |
| 48  | SS40619 | medium               | strong                           | 2<br>(4,2,2,4)                                            | 0<br>—<br>1                          | walk<br>walk                                                                                                                    | 0 vs 1 (pair): 0.74                                                                        | -                  | 50           |
| 49  | SS45363 | strong               | strong                           | 4<br>(7,4,5,4,4,6)                                        | 0<br>1<br>2<br>—<br>3                | puff<br>puff<br>unclear<br>—<br>puff                                                                                            | 0 vs 3: 0.83<br>1 vs 3: 0.85<br>2 vs 3: 0.71                                               | -                  | 51           |
| 50  | SS52147 | medium               | medium                           | 2<br>(2,2,2)                                              | 0<br>—<br>1                          | puff<br>—<br>puff                                                                                                               | 0 vs 1 (pair): 0.32                                                                        | -                  | 52           |
| 51  | R38F09  | -                    | strong                           | 10<br>(5,6,6)                                             | -                                    | unresponsive                                                                                                                    | -                                                                                          | -                  | -            |
| 52  | SS46269 | strong               | strong                           | 12<br>(10,10)                                             | -                                    | unresponsive                                                                                                                    | -                                                                                          | -                  | -            |
| 53  | SS25470 | strong               | strong                           | 5<br>(4)                                                  | -                                    | unresponsive                                                                                                                    | -                                                                                          | SS48406            | -            |
| 54  | SS25478 | strong               | strong                           | 5<br>(4,3,4)                                              | -                                    | unresponsive                                                                                                                    | -                                                                                          | -                  | -            |
| 55  | SS28382 | strong               | strong                           | 6<br>(7,7)                                                | -                                    | unresponsive                                                                                                                    | -                                                                                          | -                  | -            |
| 56  | SS29574 | strong               | strong                           | 2<br>(2,3)                                                | -                                    | unresponsive                                                                                                                    | -                                                                                          | -                  | -            |
| 57  | SS31899 | strong               | strong                           | 8<br>(7,7)                                                | -                                    | unresponsive                                                                                                                    | -                                                                                          | -                  | -            |
| 58  | SS33380 | strong               | strong                           | 7<br>(6,8)                                                | -                                    | unresponsive                                                                                                                    | -                                                                                          | -                  | -            |
| 59  | SS33433 | strong               | strong                           | 2<br>(2,2)                                                | -                                    | unresponsive                                                                                                                    | -                                                                                          | -                  | -            |
| 60  | SS38012 | strong               | strong                           | 6<br>(6,5,6)                                              | -                                    | unresponsive                                                                                                                    | -                                                                                          | SS43528            | -            |
| 61  | SS38386 | medium               | strong                           | 3<br>(4,4,4)                                              | -                                    | unresponsive                                                                                                                    | -                                                                                          | -                  | -            |
| 62  | SS38687 | strong               | strong                           | 3<br>(3,4)                                                | -                                    | unresponsive                                                                                                                    | -                                                                                          | -                  | -            |
| 63  | SS46290 | medium               | medium                           | 2<br>(-)                                                  | -                                    | unresponsive                                                                                                                    | -                                                                                          | -                  | -            |
| 64  | SS46300 | strong               | medium                           | 2<br>(2)                                                  | -                                    | unresponsive                                                                                                                    | -                                                                                          | -                  | -            |
| 65  | SS48406 | strong               | strong                           | 5<br>(7,6,10,7)                                           | -                                    | unresponsive                                                                                                                    | -                                                                                          | SS25470            | -            |
| 66  | SS48409 | strong               | strong                           | 2<br>(2,2)                                                | -                                    | unresponsive                                                                                                                    | -                                                                                          | SS48632            | -            |

Table 1 continued from previous page

| No. | GAL4    | Confocal SNR of smFP                     | 2P SNR of OpGCaMP6f and tdTomato | Number ROIs (representative fly, (other flies)) | ROI# (left-right separated by —) | Encoding (left-right separated by —)       | Level synchronous activity (ROI# vs ROI#: Corr. coef.) | Redundant GAL4                           | Supp. Video# |
|-----|---------|------------------------------------------|----------------------------------|-------------------------------------------------|----------------------------------|--------------------------------------------|--------------------------------------------------------|------------------------------------------|--------------|
| 67  | SS49982 | strong                                   | medium                           | 4<br>(3,2,2,3,4)                                | -                                | unresponsive                               | -                                                      | -                                        | -            |
| 68  | SS50004 | strong                                   | strong                           | 2<br>(2,2)                                      | -                                | unresponsive                               | -                                                      | -                                        | -            |
| 69  | SS50013 | medium                                   | medium                           | 1<br>(-)                                        | -                                | unresponsive                               | -                                                      | -                                        | -            |
| 70  | SS50652 | strong                                   | medium                           | 3<br>(4,3)                                      | -                                | unresponsive                               | -                                                      | -                                        | -            |
| 71  | SS36132 | strong                                   | -                                | -                                               | -                                | not imaged (redundant)                     | -                                                      | SS36131<br>SS36133                       | -            |
| 72  | SS36133 | strong                                   | -                                | -                                               | -                                | not imaged (redundant)                     | -                                                      | SS36131<br>SS36132                       | -            |
| 73  | SS38598 | strong                                   | -                                | -                                               | -                                | not imaged (redundant)                     | -                                                      | SS38592                                  | -            |
| 74  | SS41808 | strong                                   | -                                | -                                               | -                                | not imaged (redundant)                     | -                                                      | SS41822<br>SS41809<br>SS41820<br>SS41821 | -            |
| 75  | SS41809 | strong                                   | -                                | -                                               | -                                | not imaged (redundant)                     | -                                                      | SS41822<br>SS41808<br>SS41820<br>SS41821 | -            |
| 76  | SS41820 | strong                                   | -                                | -                                               | -                                | not imaged (redundant)                     | -                                                      | SS41822<br>SS41808<br>SS41809<br>SS41821 | -            |
| 77  | SS41821 | strong                                   | -                                | -                                               | -                                | not imaged (redundant)                     | -                                                      | SS41822<br>SS41808<br>SS41809<br>SS41820 | -            |
| 78  | SS42007 | strong                                   | -                                | -                                               | -                                | not imaged (redundant)                     | -                                                      | SS42008                                  | -            |
| 79  | SS42707 | medium                                   | -                                | -                                               | -                                | not imaged (redundant)                     | -                                                      | SS42740<br>R70H06                        | -            |
| 80  | SS43528 | strong                                   | weak                             | -                                               | -                                | not imaged (undetectable in 2P; redundant) | -                                                      | SS38012                                  | -            |
| 81  | SS48632 | medium                                   | -                                | -                                               | -                                | not imaged (redundant)                     | -                                                      | SS48409                                  | -            |
| 82  | SS51024 | strong                                   | -                                | -                                               | -                                | not imaged (redundant)                     | -                                                      | SS51029                                  | -            |
| 83  | SS52108 | strong                                   | weak                             | -                                               | -                                | not imaged (redundant)                     | -                                                      | SS25469<br>SS52106<br>SS52107            | -            |
| 84  | SS52106 | medium                                   | -                                | -                                               | -                                | not imaged (redundant)                     | -                                                      | SS25469<br>SS52107<br>SS52108            | -            |
| 85  | SS52107 | medium                                   | -                                | -                                               | -                                | not imaged (redundant)                     | -                                                      | SS25469<br>SS52106<br>SS52108            | -            |
| 86  | R86H08  | medium                                   | weak                             | -                                               | -                                | not imaged (redundant)                     | -                                                      | SS28596                                  | -            |
| 87  | SS29889 | strong (indistinguishable brain neurons) | -                                | -                                               | -                                | not imaged (redundant)                     | -                                                      | SS29890                                  | -            |
| 88  | SS29890 | strong (indistinguishable brain neurons) | -                                | -                                               | -                                | not imaged (redundant)                     | -                                                      | SS29889                                  | -            |
| 89  | SS29605 | -                                        | unreliable expression            | -                                               | -                                | not imaged (unreliable expression)         | -                                                      | -                                        | -            |
| 90  | SS31246 | unreliable expression                    | unreliable expression            | -                                               | -                                | not imaged (unreliable expression)         | -                                                      | -                                        | -            |
| 91  | SS46696 | unreliable expression                    | unreliable expression            | -                                               | -                                | not imaged (unreliable expression)         | -                                                      | -                                        | -            |
| 92  | R75E01  | strong but with glia                     | -                                | -                                               | -                                | not imaged (glia included)                 | -                                                      | -                                        | -            |
| 93  | SS37652 | medium                                   | weak                             | -                                               | -                                | not imaged (undetectable)                  | -                                                      | -                                        | -            |
| 94  | SS41602 | strong                                   | weak                             | -                                               | -                                | not imaged (undetectable)                  | -                                                      | -                                        | -            |
| 95  | SS43651 | strong                                   | weak                             | -                                               | -                                | not imaged (undetectable)                  | -                                                      | -                                        | -            |
| 96  | SS44305 | strong                                   | weak                             | -                                               | -                                | not imaged (undetectable)                  | -                                                      | -                                        | -            |
| 97  | SS46255 | strong                                   | weak                             | -                                               | -                                | not imaged (undetectable)                  | -                                                      | -                                        | -            |
| 98  | SS41824 | strong                                   | weak                             | -                                               | -                                | not imaged (undetectable)                  | -                                                      | -                                        | -            |

Table 1 continued from previous page

| No. | GAL4    | Confocal SNR of smFP | 2P SNR of OpGCaMP6f and tdTomato | Number ROIs (representative fly, seperated (other flies)) | ROI# (left-right seperated by —) | Encoding (left-right seperated by —) | Level synchronous activity (ROI# vs ROI#: Corr. coef.) | Redundant GAL4 | Supp. Video# |
|-----|---------|----------------------|----------------------------------|-----------------------------------------------------------|----------------------------------|--------------------------------------|--------------------------------------------------------|----------------|--------------|
| 99  | SS25488 | -                    | weak                             | -                                                         | -                                | not imaged (undetectable)            | -                                                      | -              | -            |
| 100 | R81G07  | weak                 | weak                             | -                                                         | -                                | not imaged (undetectable)            | -                                                      | -              | -            |
| 101 | SS45635 | weak                 | weak                             | -                                                         | -                                | not imaged (undetectable)            | -                                                      | -              | -            |
| 102 | SS45648 | weak                 | weak                             | -                                                         | -                                | not imaged (undetectable)            | -                                                      | -              | -            |
| 103 | SS46290 | weak                 | weak                             | -                                                         | -                                | not imaged (undetectable)            | -                                                      | -              | -            |
| 104 | SS46847 | weak                 | weak                             | -                                                         | -                                | not imaged (undetectable)            | -                                                      | -              | -            |
| 105 | SS47868 | weak                 | weak                             | -                                                         | -                                | not imaged (undetectable)            | -                                                      | -              | -            |
| 106 | SS50282 | weak                 | weak                             | -                                                         | -                                | not imaged (undetectable)            | -                                                      | -              | -            |
| 107 | SS50829 | weak                 | weak                             | -                                                         | -                                | not imaged (undetectable)            | -                                                      | -              | -            |
| 108 | R88C08  | weak                 | weak                             | -                                                         | -                                | not imaged (undetectable)            | -                                                      | -              | -            |
